1 **Attenuation of influenza A virus disease severity by viral co-infection in a**  
2 **mouse model**

3

4 **Short Title:** Pathogenesis of influenza viral co-infection

5

6 Andres J. Gonzalez, Emmanuel C. Ijezie, Onesmo B. Balemba, and Tanya A. Miura#

7

8 Department of Biological Sciences and Center for Modeling Complex Interactions, University of  
9 Idaho, Moscow, ID, USA

10 #Corresponding Author: Tanya A. Miura, tmiura@uidaho.edu

11

12 Abstract word count: 247

13 Text word count: 5,657

14

15 **Abstract**

16 Influenza viruses and rhinoviruses are responsible for a large number of acute respiratory  
17 viral infections in human populations and are detected as co-pathogens within hosts. Clinical and  
18 epidemiological studies suggest that co-infection by rhinovirus and influenza virus may reduce  
19 disease severity and that they may also interfere with each other's spread within a host population.  
20 To determine how co-infection by these two unrelated respiratory viruses affects pathogenesis,  
21 we established a mouse model using a minor serogroup rhinovirus (RV1B) and mouse-adapted  
22 influenza A virus (PR8). Infection of mice with RV1B two days before PR8 reduced  
23 pathogenesis of mild to moderate, but not severe PR8 infections. Disease attenuation was  
24 associated with an early inflammatory response in the lungs and enhanced clearance of PR8.  
25 However, co-infection by RV1B did not reduce PR8 viral loads early in infection or inhibit  
26 replication of PR8 within respiratory epithelia or *in vitro*. Inflammation in co-infected mice

27 remained focal, in comparison to diffuse inflammation and damage in the lungs of mice infected  
28 by PR8. These findings suggest that RV1B stimulates an early immune response that clears PR8  
29 while limiting excessive pulmonary inflammation. The timing of RV1B co-infection was a  
30 critical determinant of protection, suggesting that sufficient time is needed to induce this  
31 response. Finally, disease attenuation was not unique to RV1B: co-infection by a murine  
32 coronavirus two days before PR8 also reduced disease severity. This model will be critical for  
33 understanding the mechanisms responsible for attenuation of influenza disease during co-  
34 infection by unrelated respiratory viruses.

35

## 36 **Importance**

37       Viral infections in the respiratory tract can cause severe disease and are responsible for a  
38 majority of pediatric hospitalizations. Molecular diagnostics have revealed that approximately  
39 20% of these patients are infected by more than one unrelated viral pathogen. To understand how  
40 viral co-infection affects disease severity, we inoculated mice with a mild viral pathogen  
41 followed two days later by a virulent viral pathogen. This model demonstrated that rhinovirus  
42 can reduce the severity of influenza A virus, which corresponded with an early but controlled  
43 inflammatory response in the lungs and early clearance of influenza A virus. We further  
44 determined the dose and timing parameters that were important for effective disease attenuation  
45 and showed that influenza disease is also reduced by co-infection with a murine coronavirus.  
46 These findings demonstrate that co-infecting viruses can alter immune responses and  
47 pathogenesis in the respiratory tract.

48

## 49 **Introduction**

50           Respiratory tract infections are a leading cause of morbidity and mortality worldwide and  
51 viruses from many different families contribute to the disease burden. Advances in viral  
52 diagnostics and surveillance have led to the finding that viral co-infection, or the presence of  
53 multiple unrelated viruses, is quite common in the respiratory tract (1-3). Viruses involved in co-  
54 infections have the potential for interactions within the host that could affect replication  
55 dynamics, immune responses, and disease pathogenesis (4, 5).

56           Influenza viruses and rhinoviruses are common causes of both upper and lower  
57 respiratory tract infections across all age groups (6-8). Thus, it is not surprising that they are  
58 frequently detected in co-infected patients. During the 2009 pandemic, the severity of influenza  
59 was reduced by co-infection with rhinoviruses, though it was enhanced by co-infection with  
60 other respiratory viruses (9). These differences did not correspond with changes in viral  
61 replication, as equivalent H1N1 viral loads were detected in co-infected patients and those  
62 infected by influenza A virus alone (9). Other clinical studies have found that respiratory viral  
63 co-infection can enhance (10-12), reduce (13, 14), or have no effect (15) on the severity of  
64 influenza. These differences may be due to the viruses involved, the order that they infected the  
65 host, and differences in patient populations. The disease severity of rhinovirus infections has also  
66 been shown to be affected by viral co-infections. Co-infection by influenza viruses has been  
67 found to reduce the severity of rhinovirus infection (11) and co-infection by respiratory syncytial  
68 virus enhances disease compared to rhinovirus alone (11, 16-18). Finally, epidemiological  
69 studies suggest that rhinoviruses may interfere with the spread of influenza within populations (8,  
70 19-22). Likewise, spread of the 2009 pandemic H1N1 strain appears to have delayed the  
71 circulation of other seasonal respiratory viruses (7). Altogether, these studies suggest that  
72 respiratory viruses have complex interactions at the host and population levels. Model systems in

73 which the viral strains and infection timing and doses are controlled are needed to understand  
74 these interactions at a mechanistic level.

75 In order to study the effects of viral co-infection on influenza disease pathogenesis, we  
76 established a mouse model of co-infection using mouse-adapted influenza A virus, strain PR8.  
77 PR8 infection in BALB/c mice causes dose-dependent disease severity, in which mortality  
78 corresponds with early viral replication and cytokine production, followed by massive cellular  
79 infiltration in the lungs (23-25). To determine how PR8-mediated disease is altered by a mild  
80 viral infection, we co-infected mice with human rhinovirus strain 1B (RV1B) or a murine  
81 coronavirus, mouse hepatitis virus (MHV-1). RV1B infects mice using low-density lipoprotein  
82 as its receptor, which is found on murine respiratory epithelial cells (26). Inoculation of BALB/c  
83 mice with an extremely high dose of RV1B results in neutrophil and lymphocyte recruitment to  
84 the airways, along with expression of antiviral and proinflammatory cytokines, without causing  
85 overt disease (27). MHV-1 is a respiratory tropic coronavirus that is a native pathogen of mice.  
86 While MHV-1 causes severe disease in A/J and TLR4-deficient mouse strains, it causes dose-  
87 dependent severity in the respiratory tract of BALB/c mice (28, 29).

88 Here, we show that RV1B (RV) reduced the pathogenesis of PR8 infection and that the  
89 severity of PR8 infection and the timing of co-infection were critical determinants of disease  
90 attenuation. Co-infection-mediated protection corresponded with early but controlled pulmonary  
91 inflammation and enhanced recovery of co-infected mice. RV1B did not prevent infection by  
92 PR8 or inhibit early replication, but led to faster clearance. Interestingly, attenuation of PR8  
93 disease was not limited to co-infection by RV1B, it was also seen when mice were co-infected  
94 by MHV. By identifying the parameters that are critical for disease attenuation during co-  
95 infection, such as viral doses, order, and timing of infection, we have established a model system

96 in which we can determine how co-infecting viruses interact with the host's immune system to  
97 alter pathogenesis.

98

## 99 **Results**

100

### 101 **RV infection two days before PR8 lessens disease severity in mice**

102 Patients that are co-infected by H1N1 influenza A virus and rhinovirus have less severe  
103 disease than those that are co-infected by H1N1 and a non-rhinovirus (9). To evaluate the effects  
104 of rhinovirus co-infection on influenza disease severity, we inoculated mice with RV followed  
105 two days later by a low, medium, or high dose of PR8 (PR8<sub>Low</sub>, PR8<sub>Med</sub>, or PR8<sub>Hi</sub>). Control  
106 groups were inoculated with RV/mock or mock/PR8 on day -2/day 0. Mice were monitored daily  
107 for mortality and weight loss, and were given a score based on clinical signs of disease, including  
108 ruffled fur, hunched posture, lethargy, and labored breathing. Humane endpoints included loss of  
109 more than 25% of their starting weight and/or severe clinical signs of disease. Similar to previous  
110 studies (27), mice inoculated with RV had no mortality or morbidity, including weight loss and  
111 clinical signs (Fig. 1A, B, C; RV/Mock). Mice that were inoculated with RV had no  
112 distinguishable differences in weight loss or clinical signs from mice that received mock  
113 inoculations (data not shown). Mice inoculated with PR8<sub>Low</sub> (Mock/PR8<sub>Low</sub>) reached 40%  
114 mortality by day 8, but the remaining mice survived until end of the study (Fig. 1A). These mice  
115 began losing weight and showing clinical signs on day 3, which progressed until the peak of  
116 disease on day 8 (Fig. 1B, C). Clinical signs of disease included minor ruffling of fur and  
117 hunching of the back, which progressed to include slightly labored breathing until eventual  
118 recovery from infection. In contrast to the mice infected with PR8<sub>Low</sub> alone, mice inoculated with

119 RV two days before PR8<sub>Low</sub> (RV/PR8<sub>Low</sub>) all survived until the end of the study (Fig. 1A). Co-  
120 infected mice lost weight between days 3-7, but the rate of loss and maximum weight loss were  
121 less than mice infected by PR8<sub>Low</sub> alone (Fig. 1B). Clinical signs in co-infected mice were  
122 limited to minor ruffling and hunching and the onset of these signs was delayed until day 6  
123 compared to mice infected with low dose PR8 alone (Fig. 1C).

124 RV-mediated disease attenuation was less effective when the dose of PR8 was increased.  
125 Mice that were inoculated with a medium dose of PR8 (Mock/PR8<sub>Med</sub>) had increased mortality,  
126 weight loss, and clinical signs compared to Mock/PR8<sub>Low</sub>. Furthermore, disease severity was  
127 only partially reduced by co-infection with RV (RV/PR8<sub>Med</sub>). All mice inoculated with PR8<sub>Med</sub>  
128 alone succumbed to infection, whereas 2 of the 7 co-infected mice survived (Fig. 1D). Both  
129 groups of mice, Mock/PR8<sub>Med</sub> and RV/PR8<sub>Med</sub>, began losing weight on day 3 and continued to  
130 day 8 (Fig. 1E). Mice inoculated with PR8<sub>Med</sub> alone had more severe clinical signs throughout  
131 PR8 infection, exhibited as severe ruffling, mild lethargy, hunching, and labored breathing (Fig.  
132 1F). In contrast, co-infected (RV/PR8<sub>Med</sub>) mice had milder clinical signs limited to mild ruffling,  
133 slight hunching, and lethargy, which resolved as the surviving mice began to regain weight.

134 RV did not alter disease severity when mice were infected with a high dose of PR8. All  
135 of the mice inoculated with a PR8<sub>Hi</sub> alone reached humane endpoints by day 7, one day earlier  
136 than mice inoculated with PR8<sub>Med</sub> (Fig. 1G vs. 1D). Mock/PR8<sub>Hi</sub>-infected mice lost weight at a  
137 similar rate to mice to inoculated with Mock/PR8<sub>Med</sub> (Fig. 1H vs. 1E) but displayed more severe  
138 clinical signs at later times in infection (Fig. 1I vs. 1F). Mock/PR8<sub>Hi</sub>-infected mice had moderate  
139 ruffling and hunching on day 3, which quickly progressed to severe ruffling and hunching and  
140 moderate-severe lethargy and labored breathing before succumbing to infection (Fig. 1I). Co-  
141 infected mice (RV/PR8<sub>Hi</sub>) had no differences in mortality (Fig. 1G), weight loss (Fig. 1H), or

142 clinical signs (Fig. 1I) compared to mock/PR8<sub>HI</sub>-infected mice. In summary, RV lessened the  
143 severity of a mild or moderate, but not severe, infection by PR8 when inoculated two days before  
144 PR8.

145

#### 146 **Co-infection by RV leads to more rapid clearance of PR8 from the lungs**

147 The above experiments established that RV effectively attenuated disease due to a mild  
148 PR8 infection. We next asked whether the reduced virulence during co-infection was due to  
149 inhibition of PR8 replication within the lungs. Groups of mice were either mock-inoculated or  
150 inoculated with RV two days before inoculating with a low dose of PR8 (Mock/PR8, RV/PR8).  
151 Groups of mice were euthanized on days 4, 7, and 10 after PR8 inoculation and lungs were  
152 harvested for PR8 quantification. On day 4 after PR8 inoculation, the viral loads in single virus  
153 and co-infected mice were not significantly different, but co-infected mice had greater variation  
154 within the group (Fig. 2). However, on day 7, the Mock/PR8-infected mice still had PR8 titers in  
155 the  $10^4$ - $10^5$  range, whereas the RV/PR8-co-infected mice had undetectable levels of PR8. By day  
156 10, both groups had undetectable levels of infectious PR8. This suggests that co-infection with  
157 RV did not prevent infection or inhibit early replication of PR8, but induced more rapid  
158 clearance of PR8 from the lungs.

159 We also evaluated lung sections for PR8 antigens by immunohistochemistry. The lack of  
160 PR8 antigen staining in lung sections from mock-inoculated mice confirmed the specificity of  
161 staining (Fig. 3A). On day 4, both single- and co-infected groups had extensive infection of the  
162 bronchial epithelium (not shown) in addition to viral antigen in bronchiolar epithelium and  
163 alveoli (Fig. 3B). The Mock/PR8-infected lung tissues had more extensive sloughing of infected

164 epithelia with viral antigens associated with mucopurulent material in the airways. While  
165 Mock/PR8-infected animals had clear progression of infection from upper and lower airways  
166 into the adjacent alveoli, co-infected animals appeared to have viral antigen in the alveoli earlier  
167 and it was not always associated with infection of bronchiolar epithelium in the same region.  
168 Both groups had extensive viral antigen staining in the alveoli, with antigen detected in  
169 pneumocytes and immune cells, especially macrophages and neutrophils. On day 7, antigen  
170 staining was reduced in lung tissues from both groups and was localized in airways, especially  
171 cells that had been sloughed from the epithelium (Fig. 3C). PR8 antigens in the alveoli were  
172 mainly found in immune cells by day 7, suggesting clearance of infection. In agreement with the  
173 undetectable levels of infectious PR8, both groups had little antigen staining on day 10, which  
174 was predominantly in immune cells within focal areas (not shown). These findings support our  
175 observation that co-infection by RV did not completely inhibit replication of PR8 in the  
176 respiratory tract.

177

### 178 **RV does not interfere with replication of PR8 *in vitro***

179 Next, we used a murine lung epithelial cell line (LA-4) that is susceptible to infection by  
180 both viruses (30) to determine if co-infection by RV would interfere with PR8 replication *in vitro*.  
181 LA-4 cells were inoculated with RV 6 or 12 hours before or simultaneously with PR8. PR8  
182 released into the media was quantified by TCID<sub>50</sub> assay in MDCK cells. We confirmed that the  
183 presence of RV in these samples did not interfere with quantification of PR8 in MDCK cells (not  
184 shown). There were no significant differences at any time point between cells inoculated with  
185 PR8 alone or co-infected with RV either simultaneously with or 12 hours before PR8 (Fig. 4A,  
186 C). There were significant differences at 24 and 96 hours when cells were inoculated with RV 6



187 hours before PR8 (Fig. 4B). The lower PR8 titers at 96 hours may have been due to higher cell  
188 death from two viruses being present, providing fewer susceptible cells for PR8 replication.  
189 Though not significant, this trend was also seen when cells were inoculated with both viruses  
190 simultaneously (Fig. 4A). These data help corroborate our *in vivo* finding that RV did not inhibit  
191 replication of PR8. Rather, co-infection is most likely stimulating the immune system, leading to  
192 faster clearance of PR8.

193

#### 194 **Co-infection with RV stimulated an early yet controlled inflammatory response to PR8** 195 **infection**

196 We next evaluated the histopathology of lungs from single- (Mock/PR8) and co-  
197 (RV/PR8) infected mice on days 4, 7, and 10 after inoculation with PR8. Compared to mock-  
198 inoculated controls, both Mock/PR8- and RV/PR8-infected mice had multifocal  
199 tracheobronchitis and bronchioalveolitis (Fig. 5 A-C and not shown). Lung pathology was  
200 characterized by epithelial degeneration, necrosis and sloughing, and accumulation of  
201 neutrophils, macrophages, and lymphocytes in the inflamed areas. This was associated with the  
202 accumulation of mucopurulent discharge in the bronchioles and alveoli (Fig. 5C). The extension  
203 of inflammation from bronchioles into the surrounding lung parenchyma resulted in localized  
204 alveolitis. In general, inflammation was associated with dilated and congested blood capillaries  
205 with extravasation of blood plasma, hemorrhage, thickened alveolar septae, collapsed alveoli,  
206 and enlarged alveolar ducts observed in severe lesions (Fig. 5B, C). Although focal inflammation  
207 was found in all lobes, the right lung's caval lobe appeared to be commonly more inflamed than  
208 other lobes. Pulmonary invagination was often associated with inflamed portions of the lungs.

209 Co-infection with RV induced earlier inflammation, but reduced the severity of  
210 inflammation elicited by PR8. By day 4, lung pathology was more extensive in RV/PR8 co-  
211 infected mice than Mock/PR8-infected mice. However, by days 7 and 10, mice infected with  
212 Mock/PR8 had more severe lung pathology than RV/PR8 co-infected mice. Overall, necrosis and  
213 desquamation in the trachea, bronchi, bronchioles, and alveoli were more severe in Mock/PR8  
214 than in RV/PR8 co-infected mice. Furthermore, excessive mucopurulent material consisting of  
215 neutrophils, macrophages, cellular debris, and transudate accumulated in the lungs of Mock/PR8-  
216 infected mice. Congestion and hemorrhage were also more severe and pleurisy was only present  
217 in the lungs of Mock/PR8-infected mice. Furthermore, the expansion of bronchiolar  
218 inflammation into the parenchyma and collapse and destruction of alveoli was less extensive in  
219 lungs of RV/PR8 co-infected mice. Noteworthy, perivascular cuffing was more dense and  
220 widespread in RV/PR8 co-infected mice and their lungs had more lymphocytes and macrophages  
221 and fewer neutrophils than Mock/PR8-infected mice. These findings suggest that Mock/PR8-  
222 infected mice had more tissue damage and exacerbated inflammation while RV/PR8 co-infected  
223 mice had a more focused anti-viral cellular immune response.

224 Co-infection by RV also resulted in earlier resolution of inflammation and tissue  
225 regeneration. Type II pneumocyte hyperplasia and regeneration of the epithelium was observed  
226 in the bronchioles and alveoli of RV/PR8 co-infected mice on days 7 and 10, indicating signs of  
227 regeneration. Overall, there were fewer inflammatory cells in the alveoli in lungs of RV/PR8 co-  
228 infected mice compared with lungs of Mock/PR8-infected mice. Pleurisy was encountered in  
229 some of the lungs obtained from Mock/PR8-infected mice but not RV/PR8 co-infected mice. In  
230 summary, the findings of this study show that co-infecting mice with RV reduced the magnitude

231 of the inflammatory response to PR8 infection and accelerated epithelial repair and alveoli  
232 restoration, and the overall recovery.

233

234 **The timing of RV co-infection determines the effect on disease severity during PR8**  
235 **infection**

236 Co-infection by RV was effective at reducing disease during a mild or moderate PR8  
237 infection when given two days before PR8. We next determined whether co-infection with RV  
238 simultaneously with or two days after a low or medium dose of PR8 would also ameliorate  
239 disease. When RV and PR8<sub>Low</sub> were inoculated simultaneously (RV+PR8<sub>Low</sub>), co-infection  
240 resulted in a disease phenotype intermediate between PR8<sub>Low</sub> alone (Mock/PR8<sub>Low</sub>) and RV two  
241 days before PR8<sub>Low</sub> (RV/PR8<sub>Low</sub>) (Fig. 6A-C). RV+PR8<sub>Low</sub> co-infected mice reached 33%  
242 mortality by day 9 (Fig. 6A). This mortality was higher than mice inoculated with RV two days  
243 before PR8<sub>Low</sub> (RV/PR8<sub>Low</sub>), but significantly lower than the 100% mortality seen with mice  
244 infected with PR8<sub>Low</sub> alone (Mock/PR8<sub>Low</sub>). RV+PR8<sub>Low</sub>-infected mice lost weight at a similar  
245 rate to Mock/PR8<sub>Low</sub>-infected mice, beginning on day 3 and continuing until day 8 before  
246 recovering (Fig. 6B). Average clinical scores were also similar between simultaneous co-  
247 infection and single infection, with slight lethargy, hunching, breathing, and moderate ruffling  
248 detected on day 3 and 4 and peaking with moderate lethargy, hunching, breathing, and severe  
249 ruffling on day 7 before co-infected mice (RV+PR8<sub>Low</sub>) began recovering from infection (Fig.  
250 6C). Interestingly, when RV was given two days after PR8<sub>Low</sub> (PR8<sub>Low</sub>/RV), co-infection  
251 exacerbated PR8 disease, as evidenced by more rapid mortality, weight loss, and higher clinical  
252 scores than mice infected with Mock/PR8<sub>Low</sub> (Fig. 6A-C). PR8<sub>Low</sub>/RV co-infected mice began  
253 dying and reached 100% mortality two days before mice inoculated with Mock/PR8<sub>Low</sub> (Fig. 6B).

254 PR8<sub>Low</sub>/RV co-infected mice also lost weight at a greater rate and had dramatically higher  
255 clinical scores than other single virus- and co-infected groups (Fig. 6B, C). These increased  
256 clinical scores were due to severe lethargy and ruffling, moderate hunching, and labored  
257 breathing, which occurred earlier during infection compared to mice in the other groups (Fig.  
258 6C).

259 In contrast to PR8<sub>Low</sub>, RV was only effective at disease attenuation when given two days  
260 before a higher dose (PR8<sub>Med</sub>) of PR8. There were no significant differences in mortality, weight  
261 loss, or clinical signs between simultaneously co-infected (RV+PR8<sub>Med</sub>) mice and mice  
262 inoculated with PR8<sub>Med</sub> alone (Fig. 6D-F). Both of these groups steadily lost weight between  
263 days 3-8 and reached 100% mortality by day 8 (Fig. 6D, E). RV+PR8<sub>Med</sub> co-infected mice had  
264 slightly lower clinical scores than Mock/PR8<sub>Med</sub>-infected mice (Fig. 6F), and did not experience  
265 severely labored breathing like Mock/PR8<sub>Med</sub>-infected mice. However, these differences in  
266 clinical signs did not affect mortality. When RV was inoculated two days after PR8<sub>Med</sub>  
267 (PR8<sub>Med</sub>/RV), all mice reached humane endpoints by day 7, one day earlier than mice inoculated  
268 with Mock/PR8<sub>Med</sub> (Fig. 6D). PR8<sub>Med</sub>/RV co-infected mice lost weight at a similar rate to  
269 Mock/PR8<sub>Med</sub>-infected mice and had similar clinical scores (Fig. 6E-F). These data demonstrate  
270 that RV provides protection from PR8-induced disease in a time-dependent manner. Disease  
271 attenuation was most effective when RV had adequate time to activate a protective response.

272

### 273 **Disease attenuation is not limited to co-infection by RV**

274 We next evaluated whether attenuation of PR8 disease was limited to co-infection by RV  
275 or if a different respiratory virus would also be effective. Mice were either mock-inoculated or

276 inoculated with MHV two days before PR8 and monitored for survival and weight loss over 14  
277 days. One mouse inoculated with  $2 \times 10^3$  PFU of MHV (MHV<sub>2000</sub>/Mock) reached a humane  
278 endpoint, but the remaining mice survived until the end of the study (Fig. 7A). MHV-infected  
279 mice (MHV<sub>2000</sub>/Mock) had rapid, early weight loss followed by gradual recovery of weight (Fig.  
280 7B). These mice had moderate ruffling and hunching early in infection, which reduced to slight  
281 ruffling, lethargy, and hunching before finally recovering on day 13 (Fig. 7C). Despite the  
282 prolonged morbidity in MHV-infected mice, mice co-infected with a lethal dose of PR8  
283 (MHV<sub>2000</sub>/PR8) had similar mortality and morbidity as those infected by MHV alone (Fig. 7A-C).  
284 MHV<sub>2000</sub>/PR8 co-infected mice regained weight at a slower rate than mice inoculated with  
285 MHV<sub>2000</sub>/Mock, but eventually reached the same weight (Fig. 7B). Thus, co-infection by MHV  
286 reduced the severity of PR8-induced disease, but this dose of MHV caused significant morbidity  
287 in BALB/c mice.

288 To determine whether infection by a lower dose of MHV would cause less disease but  
289 still provide protection against PR8, we tested two additional doses of MHV:  $1 \times 10^3$  PFU  
290 (MHV<sub>1000</sub>) and  $2 \times 10^2$  PFU (MHV<sub>200</sub>). When mice were inoculated with the 2-fold lower dose of  
291 MHV (MHV<sub>1000</sub>/Mock), there was no mortality associated with infection (Fig. 7D). These mice  
292 lost weight very early in infection, but did not lose as much weight as those infected by the  
293 higher dose (Fig. 7E vs. B). MHV<sub>1000</sub>/Mock-infected mice had minor ruffling and hunching on  
294 day 0, which continued until day 9 (Fig. 7F). When MHV was inoculated two days before PR8  
295 (MHV<sub>1000</sub>/PR8), only one mouse reached a humane endpoint, and mortality was delayed until  
296 day 8, compared to day 5 for the higher dose of MHV (Fig. 7D vs. A). Similar to mice infected  
297 by MHV<sub>1000</sub> alone, MHV<sub>1000</sub>/PR8 co-infected mice lost weight early. However, co-infected mice  
298 had delayed recovery of weight and their weight was still lower than MHV<sub>1000</sub>-infected mice at

299 the end of the study (Fig. 7E), which corresponded with prolonged clinical signs of disease (Fig.  
300 7F). Although this lower dose of MHV caused a milder infection and provided similar protection  
301 against PR8-mediated mortality, morbidity was prolonged in the co-infected mice suggesting it  
302 was less effective than the higher dose.

303 When mice were inoculated with a 10-fold lower dose of MHV (MHV<sub>200</sub>/Mock), they all  
304 survived and had minimal weight loss and clinical signs of disease, which was limited to slight  
305 ruffling (Fig. 7G-I). However, mice that were co-infected with this low dose of MHV prior to  
306 PR8 (MHV<sub>200</sub>/PR8) had significant mortality, weight loss, and prolonged clinical signs of  
307 disease, including moderate lethargy and labored breathing (Fig. 6G-I). Even though this lowest  
308 dose of MHV caused minimal disease in BALB/c mice, it did not protect mice against PR8-  
309 induced morbidity and mortality. These data suggest that a dose of MHV that causes significant  
310 morbidity is required to effectively protect against a lethal dose of PR8. Although both RV and  
311 MHV given two days earlier both reduced the severity of PR8, they vary in pathogenesis and  
312 effectiveness of disease attenuation.

313

## 314 **Discussion**

315 Clinical studies have suggested that respiratory viral co-infections may alter pathogenesis  
316 compared to infection by the viruses individually. RV has been implicated in both interfering  
317 with the spread of influenza viruses and reducing the severity of influenza during co-infection (8,  
318 9, 19-22). Here, we developed a murine model of respiratory viral co-infection to study the  
319 effects on disease severity in a system where we can control the virus strains, doses, order, and  
320 timing of which they infect the host. We found that mice given RV two days before PR8 were

321 completely protected against mortality and had reduced morbidity. RV was less effective at  
322 disease attenuation when mice were given higher doses of PR8, or RV was given at the same  
323 time as PR8. Further, mice given RV two days after PR8 had enhanced disease compared to PR8  
324 alone. We also found that disease attenuation was not limited to co-infection by RV. A  
325 respiratory tropic strain of MHV also reduced PR8 disease when given two days before PR8.  
326 Unlike RV, MHV caused significant morbidity in mice. However, reducing the dose of MHV to  
327 lessen pathogenesis was less effective at reducing the severity of PR8. These data suggest that  
328 changes in pathogenesis during co-infection are dependent upon the severity of each infection  
329 and the order and timing of inoculation.

330         Despite preventing mortality and significantly inhibiting morbidity, infection of mice  
331 with RV two days before PR8 did not reduce PR8 levels in the lungs early in infection (Fig. 2) or  
332 prevent spread of PR8 within the respiratory tract (Fig. 3). These findings suggest that RV does  
333 not directly inhibit infection by PR8, which was also confirmed by our *in vitro* studies (Fig. 4).  
334 Our previous studies have shown that RV induces a robust type I IFN response in the LA-4 cell  
335 line (30), thus the lack of PR8 inhibition we saw is not due to the absence of an IFN response.  
336 This is not surprising, as the NS1 protein of PR8 is known to antagonize type I IFN responses  
337 (31). Others have shown that RV induces expression of type I and type III IFNs in the respiratory  
338 tract of infected mice (27, 32, 33). Although our data do not support a role for RV-induced IFN  
339 responses in preventing infection by PR8, IFNs may be important for inducing downstream  
340 antiviral responses that contribute to earlier clearance of PR8 in co-infected animals. In addition  
341 to promoting cell-intrinsic antiviral defense strategies, type I IFNs are important for the  
342 recruitment and functional phenotypes of myeloid cell responses to influenza virus infections (34,  
343 35). In the absence of type I IFN signaling, PR8 disease severity is increased, but the enhanced

344 disease is not completely due to increased viral loads. Rather, these studies showed that type I  
345 IFN signaling is needed to down-regulate inflammatory monocyte and neutrophil responses  
346 during PR8 infection. Furthermore, in the absence of type I IFN signaling, monocytes develop  
347 increased inflammatory phenotypes and reduced expression of genes that down-regulate  
348 inflammation (34, 35). Thus, type I IFN responses induced by RV could promote down-  
349 regulation of inflammation that we observed on days 7 and 10.

350         Histopathology analyses demonstrated that mice inoculated with RV two days before  
351 PR8 had earlier recruitment of immune cells into the lungs (Fig. 5). On day 4 after PR8 infection,  
352 co-infected animals had multiple foci of inflammation throughout the lungs. In contrast, animals  
353 infected with PR8 alone had reduced recruitment of inflammatory cells. This early immune  
354 response may lead to earlier clearance of PR8 from co-infected lungs, as we saw by day 7 (Fig.  
355 2). Although it is not virulent in mice, RV (strain 1B) induces an inflammatory response in the  
356 respiratory tracts of BALB/c and C57Bl/6 mice. The response to RV includes recruitment of  
357 neutrophils and lymphocytes, concurrent with production of antiviral cytokines and chemokines.  
358 Neutrophil levels in the airways of RV-infected mice peak on days 1 and 2 and decline by day 4,  
359 while lymphocytes are present through day 7 (27, 32, 33, 36, 37). Studies differ in whether  
360 macrophage numbers change significantly upon RV infection in mice (27, 32, 33, 36). Type I  
361 and III interferons, proinflammatory cytokines, and neutrophil and lymphocyte recruiting  
362 chemokines are also up-regulated in response to RV infection in mice (27, 32, 33). These cellular  
363 and cytokine responses are not stimulated by UV-inactivated virus, suggesting that viral  
364 replication is required (27, 33). We observed increased macrophages and lymphocytes and  
365 enhanced perivascular cuffing in histology sections from RV/PR8 co-infected animals,



366 suggesting a robust cellular immune response. Ongoing studies in our lab will determine the RV-  
367 induced immune components that are required for attenuation of PR8 disease during co-infection.

368 In contrast to the enhanced inflammation in the lungs of co-infected mice on day 4, the  
369 histopathology on days 7 and 10 was less severe in co-infected compared to PR8-infected mice  
370 (Fig. 5). This could be an indirect consequence of early viral clearance (Fig. 2) or active down-  
371 regulation of the inflammatory response in co-infected animals. Multiple studies have shown that  
372 inflammation during influenza and other respiratory viral infections can cause pathogenesis that  
373 is independent of viral levels in the lungs (34, 35, 38-40). Our histopathology data are in  
374 agreement with studies that demonstrate excessive inflammatory responses occurring as viral  
375 loads are decreasing (23, 41). We inoculated mice with PR8 two days after RV inoculation,  
376 which is just prior to the decline in neutrophil numbers in the lungs of RV-infected BALB/c mice  
377 (27). Furthermore, RV infection actively down-regulates neutrophil responses by inhibiting TLR  
378 signaling and thereby reducing expression of neutrophil-specific chemokines upon co-infection  
379 by a bacterial pathogen (42). The inflamed areas of the RV/PR8 co-infected lungs contained  
380 fewer neutrophils than mock/PR8-infected lungs. Neutrophils are known to contribute to  
381 immune-mediated damage during PR8 infection (43, 44). Thus, active down-regulation of  
382 neutrophilic inflammation by RV may contribute to the reduced severity of PR8 in our studies.

383 This study demonstrated that RV-mediated disease attenuation was less effective as we  
384 increased the dose of PR8, shortened the timing between virus inoculations, or gave RV after  
385 PR8 (Figs. 1 and 6). These differences are likely due to the kinetics and magnitudes of RV- and  
386 PR8-induced immune responses. Higher doses of PR8 likely overwhelm defense mechanisms  
387 that are induced by RV and these defense mechanisms are likely not induced quickly enough to  
388 completely protect against PR8 given at the same time. However, the observation that RV given

389 two days after PR8 exacerbates pathogenesis suggests that once a response to PR8 has been  
390 initiated, the RV-induced response may aggravate immunopathology. RV induces multiple  
391 immune components that are known to contribute to influenza disease, including neutrophils (43),  
392 NK cells (45), and type I IFNs (46, 47). Further studies are needed to identify the mechanisms  
393 that exacerbate disease when RV is given 2 days after PR8. It is possible that these are the same  
394 mechanisms that reduce disease when RV is given 2 days before PR8 and that the timing of their  
395 induction is key to regulating pathogenesis.

396 Interestingly, infection by MHV two days prior to PR8 also reduced the severity of PR8  
397 infection. Unlike RV, MHV causes morbidity and mortality in mice, though virulence is mouse  
398 strain-dependent (28, 29, 48). We have observed dose-dependent severity of MHV in BALB/c  
399 mice. Intranasal inoculation of  $2 \times 10^3$  PFU resulted in clinical disease with low mortality (Fig.  
400 7), while a dose of  $2 \times 10^5$  caused 100% mortality (data not shown). Survival of BALB/c mice  
401 upon MHV-1 infection is dependent upon a type I IFN response (49). Furthermore, mouse strain-  
402 dependent resistance to MHV-1 disease corresponds with robust expression of type I IFNs (28).  
403 Based on these studies, we expect that the type I IFN response is adequate to protect BALB/c  
404 from a lower dose, but not a lethal dose, of MHV. Other components of the BALB/c immune  
405 response to MHV-1 infection have not been studied in detail. A complete understanding of this  
406 response will be important in determining the similarities and differences in the mechanisms  
407 whereby MHV and RV reduce the severity of PR8.

408 Although our viral inoculations were all within two days of each other, other studies have  
409 shown that infection of mice by one virus can alter the immune response to a heterologous virus  
410 given after resolution of the initial infection (50). Mice given lymphocytic choriomeningitis virus  
411 (LCMV), murine cytomegalovirus (MCMV), or PR8 six weeks prior to vaccinia virus had

412 reduced titers of vaccinia virus compared to control mice. However, infection with PR8 six  
413 weeks prior to LCMV or MCMV increased titers of the second virus. Protection was associated  
414 with changing from a response dominated by neutrophils to lymphocytes or a Th2 response to a  
415 Th1 response. In contrast, when pigs were infected with porcine reproductive and respiratory  
416 syndrome virus they had increased severity of porcine respiratory coronavirus infection, which  
417 corresponded with an increased Th1 cytokine response and reduced NK cell and type I IFN  
418 responses (51). Characterizing the immune responses across our various co-infection pairs and  
419 infection timings will provide insight into how different viruses mediate heterologous immunity  
420 and if these mechanisms are generalizable.

421

## 422 **Materials and Methods**

423

### 424 **Virus stocks and cell lines**

425 Madin-Darby canine kidney cells (MDCK; ATCC #CCL-34), murine fibroblast line 17Cl.1 (52)  
426 (provided by Dr. Kathryn Holmes, University of Colorado Denver School of Medicine), and  
427 HeLa cells (ATCC #CCL-2) were grown in Dulbecco's modified Eagle medium (DMEM)  
428 supplemented with 10% fetal bovine serum (FBS; Atlanta Biologicals), and 1X antibiotic-  
429 antimycotic (ThermoFisher). Murine lung epithelial cells (LA-4; ATCC #CL-196) were grown in  
430 Ham's F12 (Kaign's modified) media (F12K; Caisson) supplemented with 10-15% FBS and  
431 antibiotics. PR8 (A/Puerto Rico/8/1934 (H1N1)), obtained from BEI Resources (NR-3169), was  
432 grown and titrated by tissue culture infectious dose-50% (TCID<sub>50</sub>) assay in MDCK cells. MHV-1  
433 (ATCC #VR-261) was grown and titrated by plaque assay in 17Cl.1 cells. RV1B (ATCC #VR-

434 1645) was grown and titrated by TCID<sub>50</sub> assay in HeLa cells. RV1B stocks were concentrated by  
435 centrifugation through 30% sucrose and the virus pellet was resuspended in PBS/2% FBS.

436

### 437 **Mouse infections**

438 All experimental protocols were approved by the University of Idaho Institutional Animal Care  
439 and Use Committee, following the National Institutes of Health Guide for the Care and Use of  
440 Laboratory Animals. As described below, mice were monitored daily and were euthanized by an  
441 overdose of sodium pentobarbital if they reached humane endpoints.

442 Six to eight-week-old female BALB/c mice were purchased from Harlan  
443 Laboratories/Envigo. Mice were housed in individually vented cages with controlled light/dark  
444 cycles and regulated temperature maintained by University of Idaho Lab Animal Research  
445 Facilities and received food and water *ad libitum*. Mice were acclimatized to the facility for 5-12  
446 days before experiments were performed under ABSL2 conditions. Mice were anesthetized with  
447 inhaled isoflurane and inoculated intranasally with 50 uL of virus. For co-infections, mice were  
448 inoculated with each virus 2 days apart or simultaneously in a total 50 uL volume. Control mice  
449 received mock inoculations of the same buffer as the respective virus: RV (PBS/2% FBS), PR8  
450 (MEM/2% FBS) or MHV (DMEM/10%FBS). See the results sections and figure legends for  
451 viral doses used in each experiment.

452 Mice were weighed and observed for clinical signs of disease daily and were humanely  
453 euthanized if they lost more than 25% of their starting weight or exhibited severe clinical signs  
454 of disease. Mice were given a daily severity score of 0-3 in each of four categories: ruffled fur,

455 lethargy, labored breathing, and hunched posture. The daily scores were totaled for each  
456 individual mice and averaged across the group of mice.

457

#### 458 **PR8 quantification**

459 Right lobes of the lungs were flash-frozen and stored at -80°C. Frozen tissues were weighed and  
460 homogenized in DMEM with 2% BSA and 1% antibiotics, and PR8 was quantified by TCID<sub>50</sub>  
461 assay on MDCK cells (53). RV does not interfere with titration of PR8 in co-infected samples  
462 when using the MDCK cell line (data not shown).

463

#### 464 **Histology and immunohistochemistry**

465 The tracheas of euthanized mice were cannulated, and the lungs were inflated with 10% formalin  
466 before submerging in 10% formalin. After fixation, lungs were embedded in paraffin, cut in 5 um  
467 sections, and stained with modified Harris hematoxylin and eosin (VWR Scientific). Lungs were  
468 processed for immunohistochemistry in the same manner as for histology. Tissue sections were  
469 deparaffinized, rehydrated, and subjected to heat-induced antigen retrieval in 10 mM sodium  
470 citrate buffer (pH 6) with 0.01% Tween 20. Endogenous peroxidase and alkaline phosphatase  
471 activities were inhibited with BLOXALL solution (Vector Laboratories). Lung sections were  
472 immunostained for the PR8 hemagglutinin protein (HA) using a polyclonal goat antibody (NR-  
473 3148, BEI Resources) and an alkaline phosphatase conjugated anti-goat antibody (ImmPRESS,  
474 Vector Laboratories) with detection by ImmPACT Vector Red (Vector Laboratories) and  
475 counterstaining with hematoxylin. Images were acquired with a Zeiss Axio Lab.A1 microscope  
476 with an Axiocam 105 color camera using ZEN 2.3 software (Zeiss).

477

### 478 ***In vitro* co-infection experiments**

479 LA-4 cells were inoculated with PR8 (MOI=1) either 6 or 12 h after or simultaneously with  
480 inoculation with RV (MOI=1). After 1 h incubation with the inoculum, cells were washed twice  
481 with serum-free medium, then incubated in Ham's F12K medium with 2% FBS and antibiotics at  
482 37°C. Supernatant media was collected from the cells at 6, 12, 18, 24, 48, 72, and 96 hours after  
483 PR8 inoculation and PR8 was titrated by TCID<sub>50</sub> assay using MDCK cells.

484

### 485 **Statistics**

486 Statistical analyses were performed using Graphpad Prism 6 software. Survival curves were  
487 compared using log-rank Mantel-Cox curve comparison. Weight loss and clinical score data  
488 were compared using multiple student's *t* tests with Holm-Sidak multiple comparison correction.  
489 PR8 titers from mouse lungs and cell culture experiments were compared using student's *t* tests  
490 without correction for multiple comparisons.

491

### 492 **Acknowledgements**

493 Research reported in this publication was supported by the National Institute of General Medical  
494 Sciences of the National Institutes of Health under Award Number P20GM104420. The content  
495 is solely the responsibility of the authors and does not necessarily represent the official views of  
496 the National Institutes of Health. The following reagents were obtained through the NIH  
497 Biodefense and Emerging Infections Research Resources Repository, NIAID, NIH: Influenza A

498 Virus, A/Puerto Rico/8/34 (H1N1) and Polyclonal Anti-Influenza Virus H1 (H0) Hemagglutinin  
499 (HA), A/Puerto Rico/8/34 (H1N1) Antiserum, Goat (NR-3148). The authors would like to thank  
500 Mr. John Clary, Dr. Bhim Thapa, Ms. Jade Rodgers, and Ms. Alicia Healey for excellent  
501 technical support. We are also grateful to Dr. George Hodges for providing critical review of the  
502 pathology and manuscript.

503

## 504 **References**

- 505 1. **Brunstein JD, Cline CL, McKinney S, Thomas E.** 2008. Evidence from multiplex  
506 molecular assays for complex multipathogen interactions in acute respiratory infections. *J*  
507 *Clin Microbiol* **46**:97-102.
- 508 2. **Fairchok MP, Martin ET, Chambers S, Kuypers J, Behrens M, Braun LE, Englund**  
509 **JA.** 2010. Epidemiology of viral respiratory tract infections in a prospective cohort of  
510 infants and toddlers attending daycare. *J Clin Virol* **49**:16-20.
- 511 3. **Calvo C, Garcia-Garcia ML, Blanco C, Vazquez MC, Frias ME, Perez-Brena P,**  
512 **Casas I.** 2008. Multiple simultaneous viral infections in infants with acute respiratory  
513 tract infections in Spain. *J Clin Virol* **42**:268-272.
- 514 4. **DaPalma T, Doonan BP, Trager NM, Kasman LM.** 2010. A systematic approach to  
515 virus-virus interactions. *Virus Res* **149**:1-9.
- 516 5. **Opatowski L, Baguelin M, Eggo RM.** 2018. Influenza interaction with cocirculating  
517 pathogens and its impact on surveillance, pathogenesis, and epidemic profile: A key role  
518 for mathematical modelling. *PLoS Pathog* **14**:e1006770.
- 519 6. **Jain S, Williams DJ, Arnold SR, Ampofo K, Bramley AM, Reed C, Stockmann C,**  
520 **Anderson EJ, Grijalva CG, Self WH, Zhu Y, Patel A, Hymas W, Chappell JD,**  
521 **Kaufman RA, Kan JH, Dansie D, Lenny N, Hillyard DR, Haynes LM, Levine M,**  
522 **Lindstrom S, Winchell JM, Katz JM, Erdman D, Schneider E, Hicks LA,**  
523 **Wunderink RG, Edwards KM, Pavia AT, McCullers JA, Finelli L, Team CES.** 2015.  
524 Community-acquired pneumonia requiring hospitalization among U.S. children. *N Engl J*  
525 *Med* **372**:835-845.
- 526 7. **Grondahl B, Ankermann T, von Bismarck P, Rockahr S, Kowalzik F, Gehring S,**  
527 **Meyer C, Knuf M, Puppe W.** 2014. The 2009 pandemic influenza A(H1N1) coincides  
528 with changes in the epidemiology of other viral pathogens causing acute respiratory tract  
529 infections in children. *Infection* **42**:303-308.
- 530 8. **Greer RM, McErlean P, Arden KE, Faux CE, Nitsche A, Lambert SB, Nissen MD,**  
531 **Slouts TP, Mackay IM.** 2009. Do rhinoviruses reduce the probability of viral co-  
532 detection during acute respiratory tract infections? *J Clin Virol* **45**:10-15.
- 533 9. **Esper FP, Spahlinger T, Zhou L.** 2011. Rate and influence of respiratory virus co-  
534 infection on pandemic (H1N1) influenza disease. *J Infect* **63**:260-266.

- 535 10. **Papadopoulos NG, Moustaki M, Tsolia M, Bossios A, Astra E, Prezerakou A,**  
536 **Gourgiotis D, Kafetzis D.** 2002. Association of rhinovirus infection with increased  
537 disease severity in acute bronchiolitis. *Am J Respir Crit Care Med* **165**:1285-1289.
- 538 11. **Aberle JH, Aberle SW, Pracher E, Hutter HP, Kundi M, Popow-Kraupp T.** 2005.  
539 Single versus dual respiratory virus infections in hospitalized infants: impact on clinical  
540 course of disease and interferon-gamma response. *Pediatr Infect Dis J* **24**:605-610.
- 541 12. **Marcos MA, Ramon S, Anton A, Martinez E, Vilella A, Olive V, Cilloniz C, Moreno**  
542 **A, Torres A, Pumarola T.** 2011. Clinical relevance of mixed respiratory viral infections  
543 in adults with influenza A H1N1. *Eur Respir J* **38**:739-742.
- 544 13. **Martin ET, Kuypers J, Wald A, Englund JA.** 2012. Multiple versus single virus  
545 respiratory infections: viral load and clinical disease severity in hospitalized children.  
546 *Influenza Other Respi Viruses* **6**:71-77.
- 547 14. **Martinez-Roig A, Salvado M, Caballero-Rabasco MA, Sanchez-Buenavida A,**  
548 **Lopez-Segura N, Bonet-Alcaina M.** 2015. Viral coinfection in childhood respiratory  
549 tract infections. *Arch Bronconeumol* **51**:5-9.
- 550 15. **Camargo C, Guatura SB, Bellei N.** 2012. Respiratory viral coinfection among  
551 hospitalized patients with H1N1 2009 during the first pandemic wave in Brazil. *Braz J*  
552 *Infect Dis* **16**:180-183.
- 553 16. **Yoshida LM, Suzuki M, Nguyen HA, Le MN, Dinh Vu T, Yoshino H, Schmidt WP,**  
554 **Nguyen TT, Le HT, Morimoto K, Moriuchi H, Dang DA, Ariyoshi K.** 2013.  
555 Respiratory syncytial virus: co-infection and paediatric lower respiratory tract infections.  
556 *Eur Respir J* **42**:461-469.
- 557 17. **Marguet C, Lubrano M, Gueudin M, Le Roux P, Deschildre A, Forget C, Couderc L,**  
558 **Siret D, Donnou MD, Bubenheim M, Vabret A, Freymuth F.** 2009. In very young  
559 infants severity of acute bronchiolitis depends on carried viruses. *PLoS One* **4**:e4596.
- 560 18. **Richard N, Komurian-Pradel F, Javouhey E, Perret M, Rajoharison A, Bagnaud A,**  
561 **Billaud G, Vernet G, Lina B, Floret D, Paranhos-Baccala G.** 2008. The impact of dual  
562 viral infection in infants admitted to a pediatric intensive care unit associated with severe  
563 bronchiolitis. *Pediatric Infectious Disease Journal* **27**:213-217.
- 564 19. **Anestad G, Nordbo SA.** 2011. Virus interference. Did rhinoviruses activity hamper the  
565 progress of the 2009 influenza A (H1N1) pandemic in Norway? *Med Hypotheses*  
566 **77**:1132-1134.
- 567 20. **Casalegno JS, Ottmann M, Duchamp MB, Escuret V, Billaud G, Frobert E, Morfin**  
568 **F, Lina B.** 2010. Rhinoviruses delayed the circulation of the pandemic influenza A  
569 (H1N1) 2009 virus in France. *Clin Microbiol Infect* **16**:326-329.
- 570 21. **Linde A, Rotzen-Ostlund M, Zwegberg-Wirgart B, Rubinova S, Brytting M.** 2009.  
571 Does viral interference affect spread of influenza? *Euro Surveill* **14**.
- 572 22. **Pascalis H, Temmam S, Turpin M, Rollot O, Flahault A, Carrat F, de Lamballerie**  
573 **X, Gerardin P, Dellagi K.** 2012. Intense co-circulation of non-influenza respiratory  
574 viruses during the first wave of pandemic influenza pH1N1/2009: a cohort study in  
575 Reunion Island. *PLoS One* **7**:e44755.
- 576 23. **Vogel AJ, Harris S, Marsteller N, Condon SA, Brown DM.** 2014. Early cytokine  
577 dysregulation and viral replication are associated with mortality during lethal influenza  
578 infection. *Viral Immunol* **27**:214-224.



- 579 24. **Fukushi M, Ito T, Oka T, Kitazawa T, Miyoshi-Akiyama T, Kirikae T, Yamashita**  
580 **M, Kudo K.** 2011. Serial histopathological examination of the lungs of mice infected  
581 with influenza A virus PR8 strain. *PLoS One* **6**:e21207.
- 582 25. **Sugamata R, Dobashi H, Nagao T, Yamamoto K, Nakajima N, Sato Y, Aratani Y,**  
583 **Oshima M, Sata T, Kobayashi K, Kawachi S, Nakayama T, Suzuki K.** 2012.  
584 Contribution of neutrophil-derived myeloperoxidase in the early phase of fulminant acute  
585 respiratory distress syndrome induced by influenza virus infection. *Microbiol Immunol*  
586 **56**:171-182.
- 587 26. **Tuthill TJ, Papadopoulos NG, Jourdan P, Challinor LJ, Sharp NA, Plumpton C,**  
588 **Shah K, Barnard S, Dash L, Burnet J, Killington RA, Rowlands DJ, Clarke NJ,**  
589 **Blair ED, Johnston SL.** 2003. Mouse respiratory epithelial cells support efficient  
590 replication of human rhinovirus. *J Gen Virol* **84**:2829-2836.
- 591 27. **Bartlett NW, Walton RP, Edwards MR, Aniscenko J, Caramori G, Zhu J, Glanville**  
592 **N, Choy KJ, Jourdan P, Burnet J, Tuthill TJ, Pedrick MS, Hurle MJ, Plumpton C,**  
593 **Sharp NA, Bussell JN, Swallow DM, Schwarze J, Guy B, Almond JW, Jeffery PK,**  
594 **Lloyd CM, Papi A, Killington RA, Rowlands DJ, Blair ED, Clarke NJ, Johnston SL.**  
595 2008. Mouse models of rhinovirus-induced disease and exacerbation of allergic airway  
596 inflammation. *Nat Med* **14**:199-204.
- 597 28. **De Albuquerque N, Baig E, Ma X, Zhang J, He W, Rowe A, Habal M, Liu M,**  
598 **Shalev I, Downey GP, Gorczynski R, Butany J, Leibowitz J, Weiss SR, McGilvray**  
599 **ID, Phillips MJ, Fish EN, Levy GA.** 2006. Murine hepatitis virus strain 1 produces a  
600 clinically relevant model of severe acute respiratory syndrome in A/J mice. *J Virol*  
601 **80**:10382-10394.
- 602 29. **Khanolkar A, Hartwig SM, Haag BA, Meyerholz DK, Harty JT, Varga SM.** 2009.  
603 Toll-like receptor 4 deficiency increases disease and mortality after mouse hepatitis virus  
604 type 1 infection of susceptible C3H mice. *J Virol* **83**:8946-8956.
- 605 30. **VanLeuven JT, Ridenhour BJ, Gonzalez AJ, Miller CR, Miura TA.** 2017. Lung  
606 epithelial cells have virus-specific and shared gene expression responses to infection by  
607 diverse respiratory viruses. *PLoS One* **12**:e0178408.
- 608 31. **Garcia-Sastre A, Egorov A, Matassov D, Brandt S, Levy DE, Durbin JE, Palese P,**  
609 **Muster T.** 1998. Influenza A virus lacking the NS1 gene replicates in interferon-deficient  
610 systems. *Virology* **252**:324-330.
- 611 32. **Glanville N, Peel TJ, Schroder A, Aniscenko J, Walton RP, Finotto S, Johnston SL.**  
612 2016. Tbet Deficiency Causes T Helper Cell Dependent Airways Eosinophilia and Mucus  
613 Hypersecretion in Response to Rhinovirus Infection. *PLoS Pathog* **12**:e1005913.
- 614 33. **Girkin J, Hatchwell L, Foster P, Johnston SL, Bartlett N, Collison A, Mattes J.** 2015.  
615 CCL7 and IRF-7 Mediate Hallmark Inflammatory and IFN Responses following  
616 Rhinovirus 1B Infection. *J Immunol* **194**:4924-4930.
- 617 34. **Seo SU, Kwon HJ, Ko HJ, Byun YH, Seong BL, Uematsu S, Akira S, Kweon MN.**  
618 2011. Type I interferon signaling regulates Ly6C(hi) monocytes and neutrophils during  
619 acute viral pneumonia in mice. *PLoS Pathog* **7**:e1001304.
- 620 35. **Stifter SA, Bhattacharyya N, Pillay R, Florido M, Triccas JA, Britton WJ, Feng CG.**  
621 2016. Functional Interplay between Type I and II Interferons Is Essential to Limit  
622 Influenza A Virus-Induced Tissue Inflammation. *PLoS Pathog* **12**:e1005378.

- 623 36. **Chung Y, Hong JY, Lei J, Chen Q, Bentley JK, Hershenson MB.** 2015. Rhinovirus  
624 infection induces interleukin-13 production from CD11b-positive, M2-polarized  
625 exudative macrophages. *Am J Respir Cell Mol Biol* **52**:205-216.
- 626 37. **Ganesan S, Pham D, Jing Y, Farazuddin M, Hudy MH, Unger B, Comstock AT,  
627 Proud D, Lauring AS, Sajjan US.** 2016. TLR2 Activation Limits Rhinovirus-  
628 Stimulated CXCL-10 by Attenuating IRAK-1-Dependent IL-33 Receptor Signaling in  
629 Human Bronchial Epithelial Cells. *J Immunol* **197**:2409-2420.
- 630 38. **Oshansky CM, Gartland AJ, Wong SS, Jeevan T, Wang D, Roddam PL, Caniza MA,  
631 Hertz T, Devincenzo JP, Webby RJ, Thomas PG.** 2014. Mucosal immune responses  
632 predict clinical outcomes during influenza infection independently of age and viral load.  
633 *Am J Respir Crit Care Med* **189**:449-462.
- 634 39. **Rutigliano JA, Sharma S, Morris MY, Oguin TH, 3rd, McClaren JL, Doherty PC,  
635 Thomas PG.** 2014. Highly pathological influenza A virus infection is associated with  
636 augmented expression of PD-1 by functionally compromised virus-specific CD8+ T cells.  
637 *J Virol* **88**:1636-1651.
- 638 40. **Lin KL, Suzuki Y, Nakano H, Ramsburg E, Gunn MD.** 2008. CCR2+ monocyte-  
639 derived dendritic cells and exudate macrophages produce influenza-induced pulmonary  
640 immune pathology and mortality. *J Immunol* **180**:2562-2572.
- 641 41. **Le Goffic R, Balloy V, Lagranderie M, Alexopoulou L, Escriou N, Flavell R,  
642 Chignard M, Si-Tahar M.** 2006. Detrimental contribution of the Toll-like receptor  
643 (TLR)3 to influenza A virus-induced acute pneumonia. *PLoS Pathog* **2**:e53.
- 644 42. **Unger BL, Faris AN, Ganesan S, Comstock AT, Hershenson MB, Sajjan US.** 2012.  
645 Rhinovirus attenuates non-typeable *Haemophilus influenzae*-stimulated IL-8 responses via  
646 TLR2-dependent degradation of IRAK-1. *PLoS Pathog* **8**:e1002969.
- 647 43. **Narasaraju T, Yang E, Samy RP, Ng HH, Poh WP, Liew AA, Phoon MC, van  
648 Rooijen N, Chow VT.** 2011. Excessive neutrophils and neutrophil extracellular traps  
649 contribute to acute lung injury of influenza pneumonitis. *Am J Pathol* **179**:199-210.
- 650 44. **Ichikawa A, Kuba K, Morita M, Chida S, Tezuka H, Hara H, Sasaki T, Ohteki T,  
651 Ranieri VM, dos Santos CC, Kawaoka Y, Akira S, Luster AD, Lu B, Penninger JM,  
652 Uhlig S, Slutsky AS, Imai Y.** 2013. CXCL10-CXCR3 enhances the development of  
653 neutrophil-mediated fulminant lung injury of viral and nonviral origin. *Am J Respir Crit  
654 Care Med* **187**:65-77.
- 655 45. **Zhou G, Juang SW, Kane KP.** 2013. NK cells exacerbate the pathology of influenza  
656 virus infection in mice. *Eur J Immunol* **43**:929-938.
- 657 46. **Marois I, Cloutier A, Garneau E, Richter MV.** 2012. Initial infectious dose dictates the  
658 innate, adaptive, and memory responses to influenza in the respiratory tract. *J Leukoc  
659 Biol* **92**:107-121.
- 660 47. **Davidson S, Crotta S, McCabe TM, Wack A.** 2014. Pathogenic potential of interferon  
661 alpha in acute influenza infection. *Nat Commun* **5**:3864.
- 662 48. **Khanolkar A, Hartwig SM, Haag BA, Meyerholz DK, Epping LL, Haring JS, Varga  
663 SM, Harty JT.** 2009. Protective and pathologic roles of the immune response to mouse  
664 hepatitis virus type 1: implications for severe acute respiratory syndrome. *J Virol*  
665 **83**:9258-9272.
- 666 49. **Channappanavar R, Fehr AR, Vijay R, Mack M, Zhao J, Meyerholz DK, Perlman S.**  
667 2016. Dysregulated Type I Interferon and Inflammatory Monocyte-Macrophage

- 668 Responses Cause Lethal Pneumonia in SARS-CoV-Infected Mice. *Cell Host Microbe*  
669 **19**:181-193.
- 670 50. **Chen HD, Fraire AE, Joris I, Welsh RM, Selin LK.** 2003. Specific history of  
671 heterologous virus infections determines anti-viral immunity and immunopathology in  
672 the lung. *Am J Pathol* **163**:1341-1355.
- 673 51. **Jung K, Renukaradhya GJ, Alekseev KP, Fang Y, Tang Y, Saif LJ.** 2009. Porcine  
674 reproductive and respiratory syndrome virus modifies innate immunity and alters disease  
675 outcome in pigs subsequently infected with porcine respiratory coronavirus: implications  
676 for respiratory viral co-infections. *J Gen Virol* **90**:2713-2723.
- 677 52. **Sturman LS, Takemoto KK.** 1972. Enhanced growth of a murine coronavirus in  
678 transformed mouse cells. *Infect Immun* **6**:501-507.
- 679 53. **Szretter KJ, Balish AL, Katz JM.** 2006. Influenza: propagation, quantification, and  
680 storage. *Curr Protoc Microbiol* **Chapter 15**:Unit 15G 11.

681

682

## 683 **Figure Legends**

684 **FIG 1** Disease kinetics in mice infected by PR8 or co-infected with RV two days before PR8.  
685 Mice were either mock-inoculated or inoculated with  $7.6 \times 10^6$  TCID<sub>50</sub> units of RV on day -2. On  
686 day 0, mice were either mock-inoculated or inoculated with PR8 at (A-C) ~100 (PR8<sub>Low</sub>), (D-F)  
687 ~200 (PR8<sub>Med</sub>), or (G-I)  $7.5 \times 10^3$  (PR8<sub>Hi</sub>) TCID<sub>50</sub> units. Mice were monitored for (A, D, G)  
688 mortality, (B, E, H) weight loss, and (C, F, I) clinical signs of disease, including lethargy, ruffled  
689 fur, hunched back, and labored breathing. Clinical scores were assigned on a scale of 0-3 in each  
690 category and total daily scores were averaged. Data represent the means and standard errors for  
691 5-7 mice and are representative of two independent experiments. Survival curves were compared  
692 using log-rank Mantel-Cox curve comparison. Weight loss and clinical score data were  
693 compared using multiple student's *t* tests with Holm-Sidak multiple comparison correction.  
694 Significant differences compared to Mock/PR8 are indicated \**P* < 0.05, \*\**P* < 0.01, \*\*\* *P* <  
695 0.001.

696

697 **FIG 2** PR8 titers in the lungs of mice infected by PR8 or co-infected by RV two days before PR8.  
698 Mice were either mock-inoculated or inoculated with  $7.6 \times 10^6$  TCID<sub>50</sub> units of RV on day -2. On  
699 day 0, mice were either mock-inoculated or inoculated with ~100 TCID<sub>50</sub> units of PR8. PR8 was  
700 titrated by TCID<sub>50</sub> assay of homogenized lungs. Data for individual mice are shown with lines  
701 indicating means and standard errors for each group. The dotted line indicates the limit of  
702 detection of the assay. Titers were compared between groups using a student's *t*-test, which  
703 determined they were not significantly different.

704

705 **FIG 3** Immunohistochemistry of PR8 antigen in the lungs of mice infected by PR8 or co-  
706 infected with RV two days before PR8. Images taken in the indicated regions of the lungs and at  
707 the indicated magnifications show (A) mice given mock inoculations on days -2 and 0 and (B, C)  
708 mice given Mock/PR8 or RV/PR8 on day -2/day 0. Tissue sections were immunostained for the  
709 PR8 hemagglutinin protein, which was visualized by vector red, and counterstained with  
710 hematoxylin. Lung tissues were collected on (B) day 4 and (C) day 7 after PR8 inoculation.  
711 Images were representative of multiple sections from two animals per group and time point.  
712 Arrows show examples of antigen in epithelial cells; arrowheads show examples of antigen in  
713 leukocytes, predominantly macrophages and neutrophils; stars indicate mucopurulent material.

714

715 **FIG 4** Growth curves of PR8 from cells infected by PR8 or RV and PR8. LA-4 cells were  
716 inoculated with RV (moi = 1) (A) simultaneously with, (B) 6 hours before, or (C) 12 hours  
717 before inoculation with PR8 (moi =1). Media was collected at the indicated times after PR8

718 inoculation and titrated for PR8 by TCID<sub>50</sub> assay. Significant differences compared to Mock/PR8  
719 were determined by students *t*-test. \*P < 0.05, \*\*P < 0.01, \*\*\* P < 0.001.

720

721 **FIG 5** Histopathology of mouse lungs infected by PR8 or co-infected with RV two days before  
722 PR8. Mice were either mock-inoculated or inoculated with 7.6x10<sup>6</sup> TCID<sub>50</sub> units of RV on day -  
723 2. On day 0, mice were either mock-inoculated or inoculated with ~100 TCID<sub>50</sub> units of PR8.  
724 Lungs were paraffin-embedded and sections were stained with hematoxylin and eosin. Images  
725 were representative of multiple tissue sections from two mice per group and time point. (A)  
726 shows images from lung sections of Mock/Mock inoculated mice taken with 10X and 40X  
727 objectives. (B) shows images from the indicated groups and days taken with 10X objective. (C)  
728 shows images from the indicated groups and days taken with 40X objective. Labeled structures  
729 include bronchioles (B), terminal bronchioles (T), respiratory bronchioles (R), normal alveoli  
730 (An), inflamed alveoli (Ai), and blood vessels (V).

731

732 **FIG 6** Disease kinetics in mice co-infected by RV two days before, simultaneously with, or two  
733 days after PR8. Groups of 6-7 BALB/c mice were either mock-inoculated or inoculated with  
734 7.6x10<sup>6</sup> TCID<sub>50</sub> units of RV two days before (RV/PR8), simultaneously with (RV+PR8), or two  
735 days after (PR8/RV) either inoculation with ~100 (PR8<sub>Low</sub>) or ~200 (PR8<sub>Med</sub>) TCID<sub>50</sub> units of  
736 PR8. Mice were monitored for mortality, weight loss, and clinical signs of disease (lethargy,  
737 ruffled fur, hunched posture, labored breathing) for 14 days after PR8 inoculation. (A-C) RV and  
738 low dose PR8 co-infection mortality (A), weight loss (B), and clinical scores (C). (D-F) RV and  
739 medium dose PR8 co-infection mortality (D), weight loss (E), and clinical scores (F). Survival

740 curves were compared using log-rank Mantel-Cox curve comparison. Weight loss and clinical  
741 score data were compared using multiple student's *t* tests with Holm-Sidak multiple comparison  
742 correction. Significant differences compared to Mock/PR8 are indicated \**P* < 0.05, \*\**P* < 0.01,  
743 \*\*\* *P* < 0.001.

744

745 **FIG 7** Disease kinetics in mice co-infected by MHV two days before PR8. Groups of 5-6  
746 BALB/c mice were either mock-inoculated or inoculated with  $2.0 \times 10^3$  (MHV<sub>2000</sub>),  $1.0 \times 10^3$   
747 (MHV<sub>1000</sub>), or  $2.0 \times 10^2$  (MHV<sub>200</sub>) PFU of MHV two days before inoculation with ~100 TCID<sub>50</sub>  
748 units of PR8. Mice were monitored for mortality, weight loss, and clinical signs of disease  
749 (lethargy, ruffled fur, hunched posture, labored breathing) for 14 days after PR8 inoculation. (A-  
750 C) MHV<sub>2000</sub> and PR8 co-infection mortality (A), weight loss (B), and clinical scores (C). (D-F)  
751 MHV<sub>1000</sub> and PR8 co-infection mortality (D), weight loss (E), and clinical scores (F). (G-I)  
752 MHV<sub>200</sub> and PR8 co-infection mortality (G), weight loss (H), and clinical scores (I). Survival  
753 curves were compared using log-rank Mantel-Cox curve comparison. Weight loss and clinical  
754 score data were compared using multiple student's *t* tests with Holm-Sidak multiple comparison  
755 correction. Significant differences compared to Mock/PR8 are indicated \**P* < 0.05, \*\**P* < 0.01,  
756 \*\*\* *P* < 0.001.

Figure 1

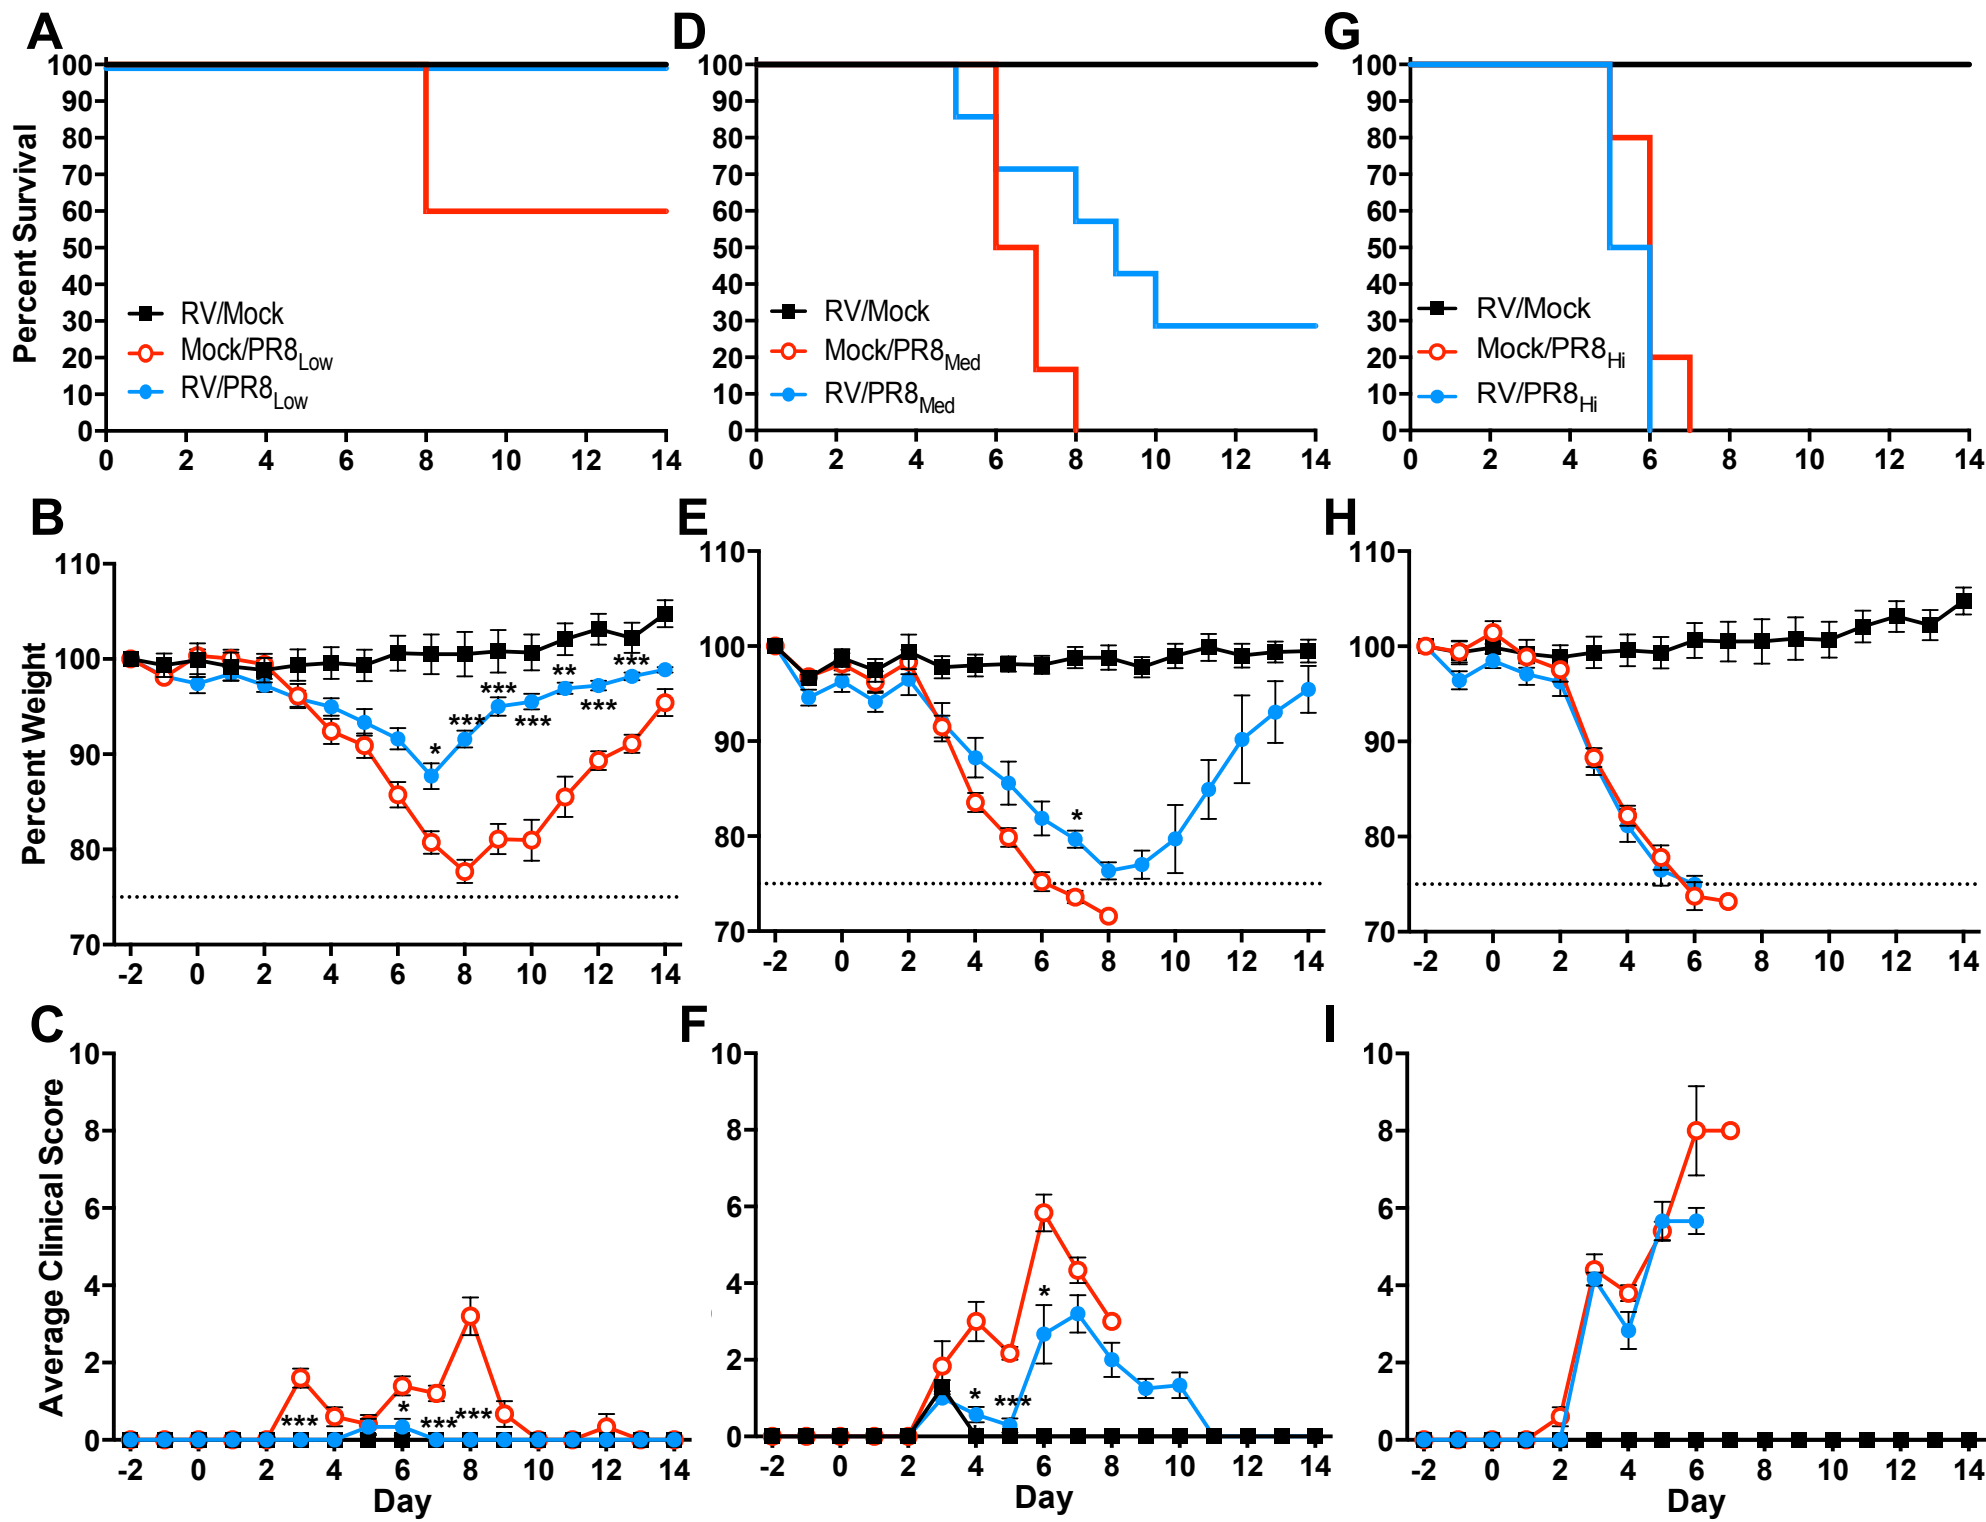

# Figure 2

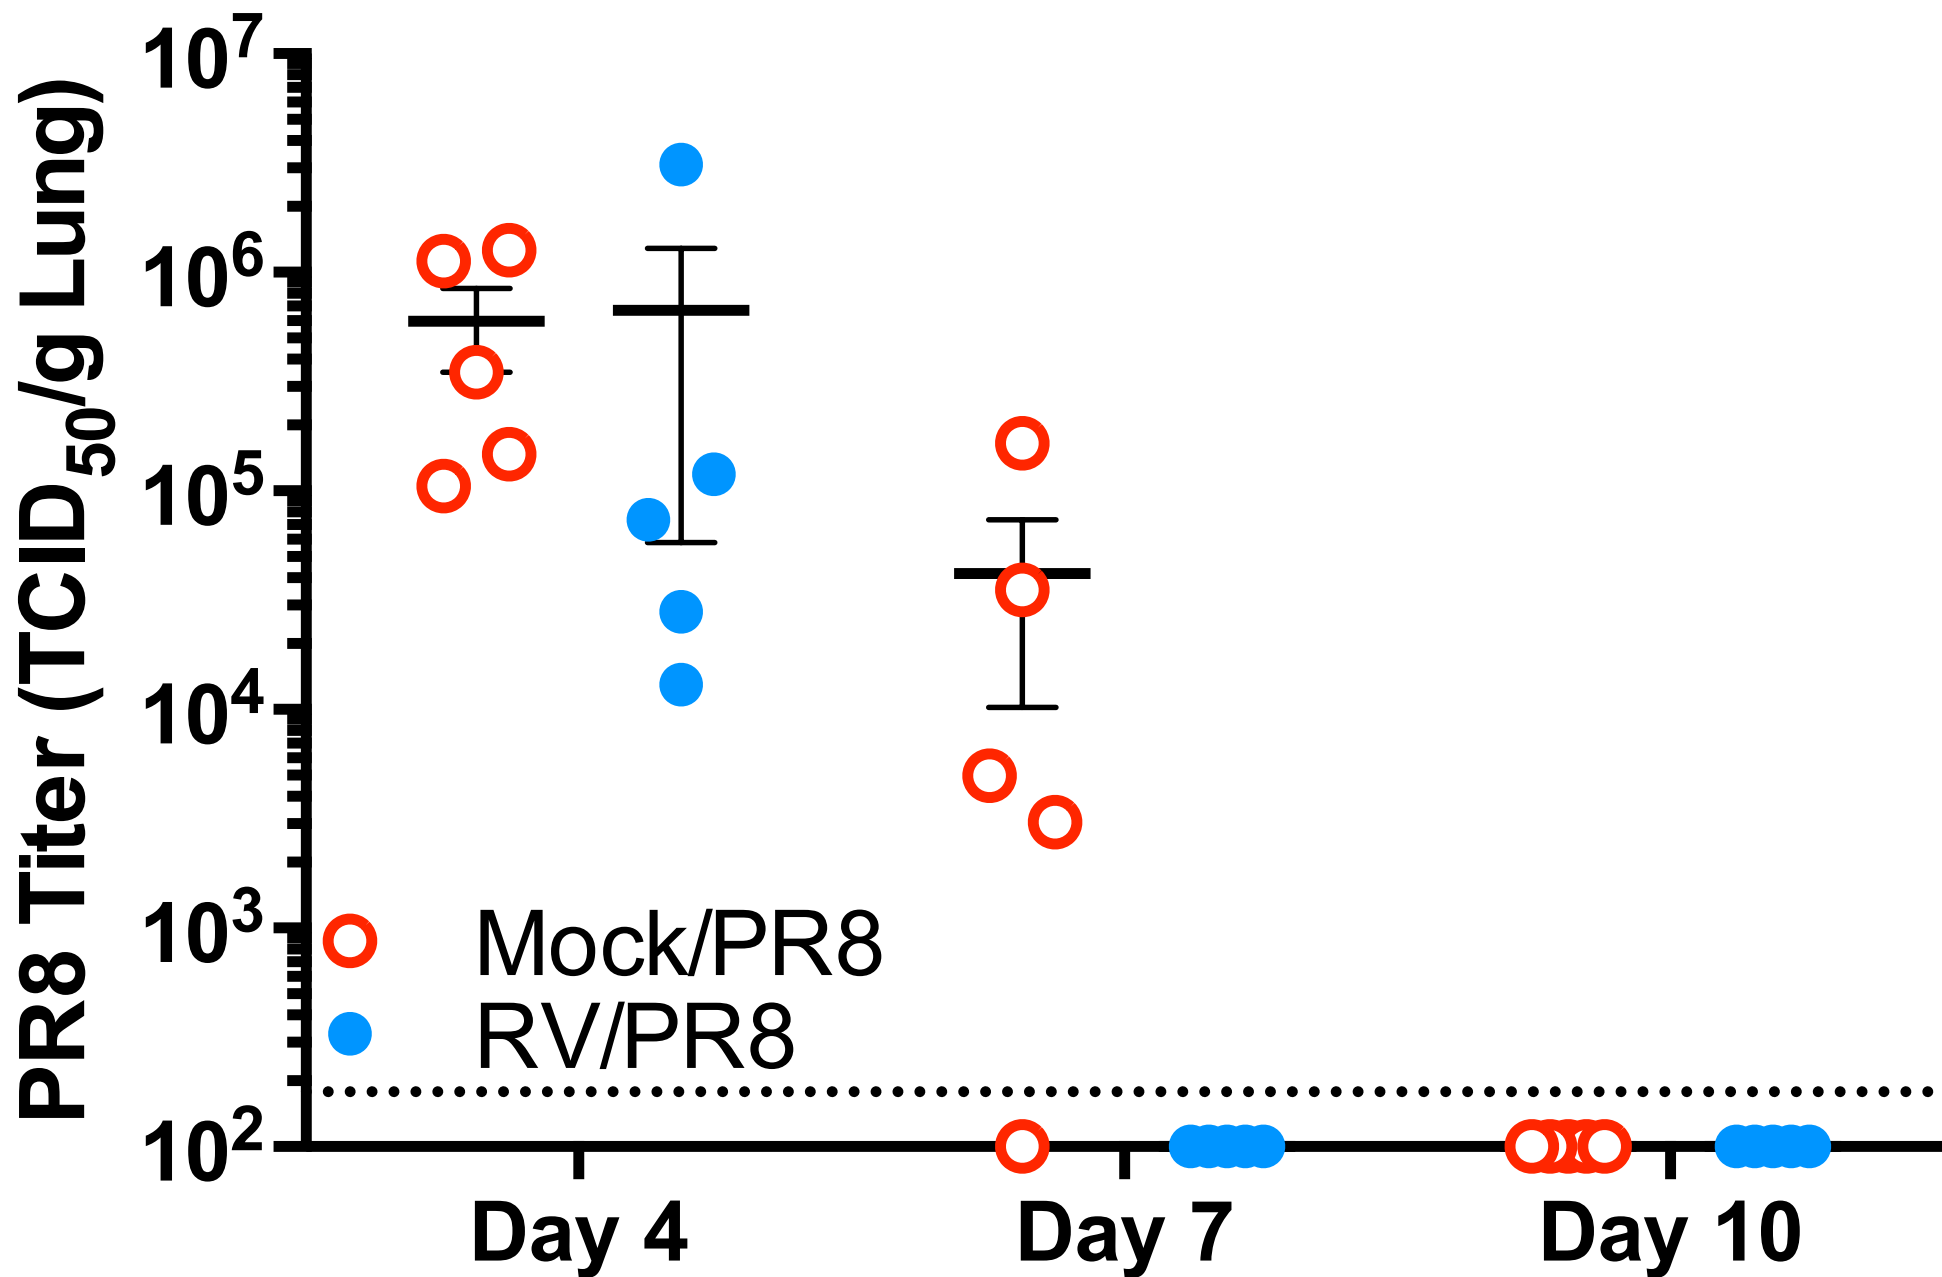



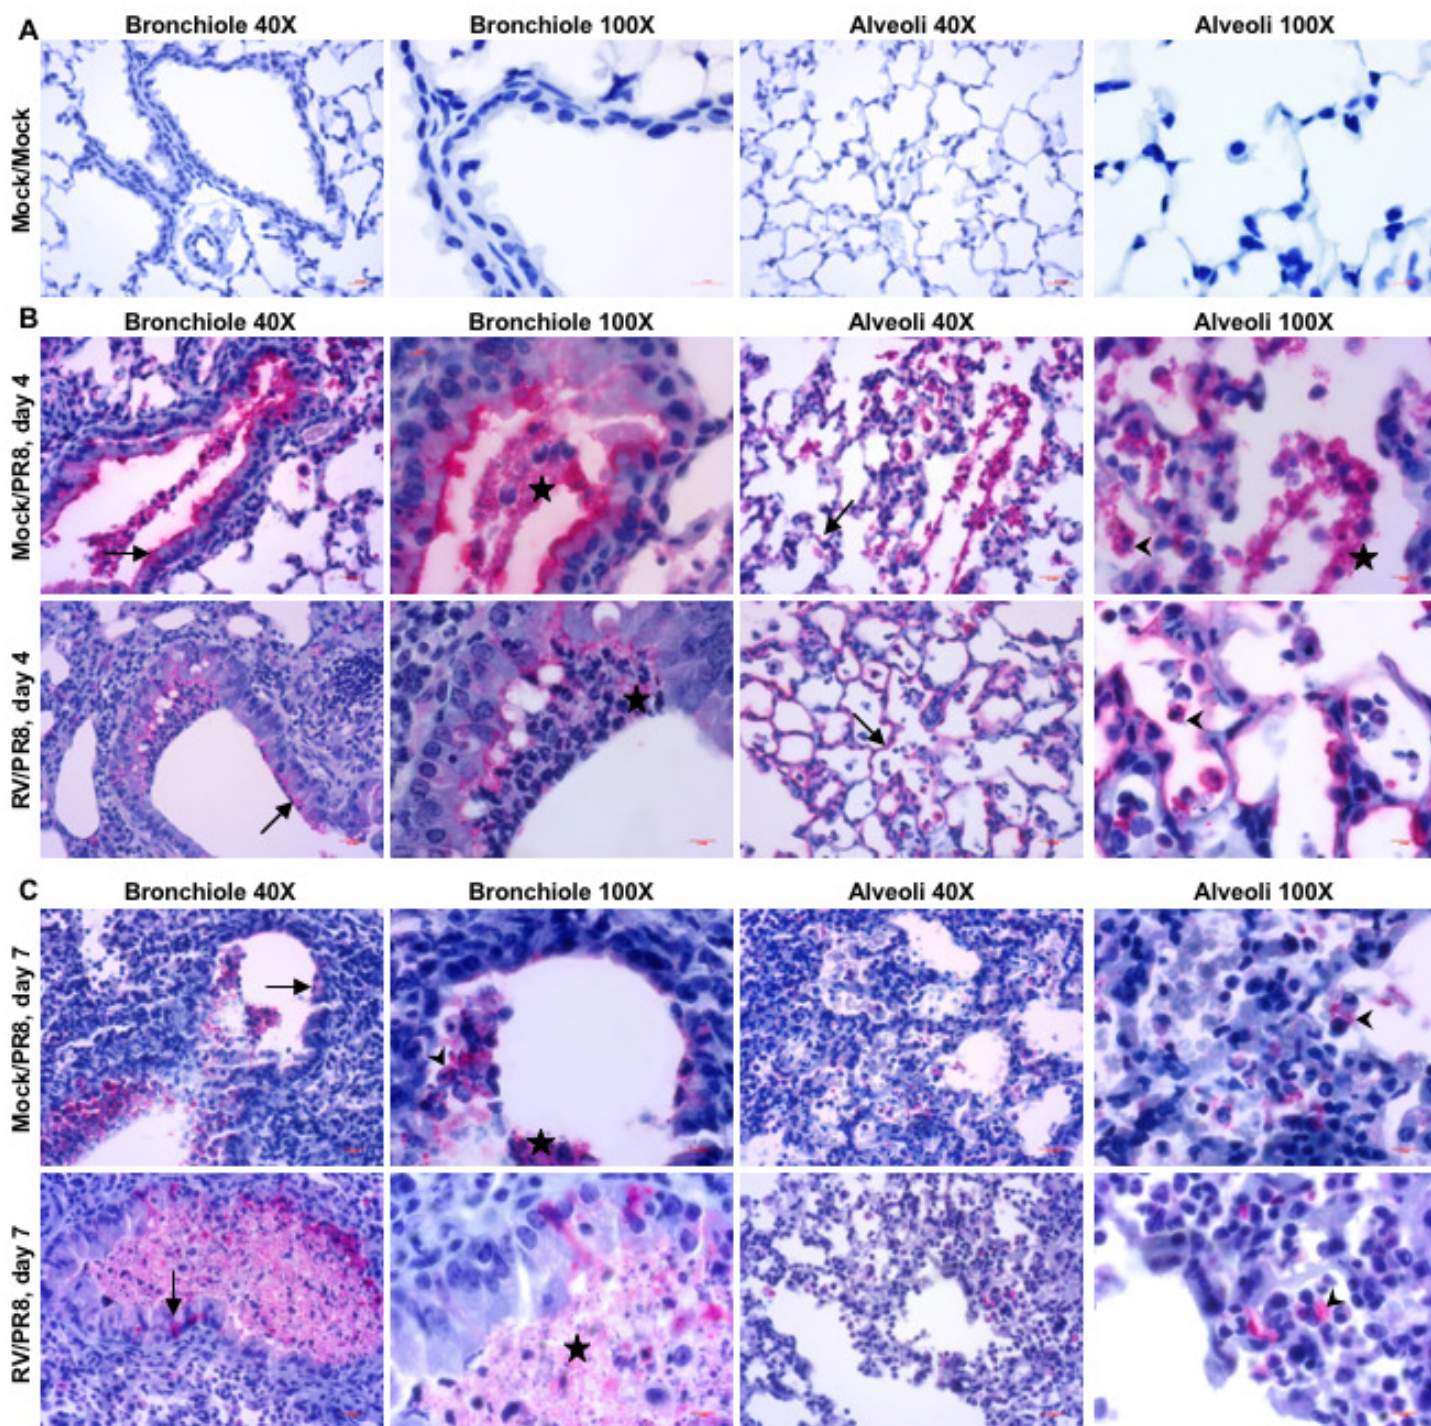

Figure 4

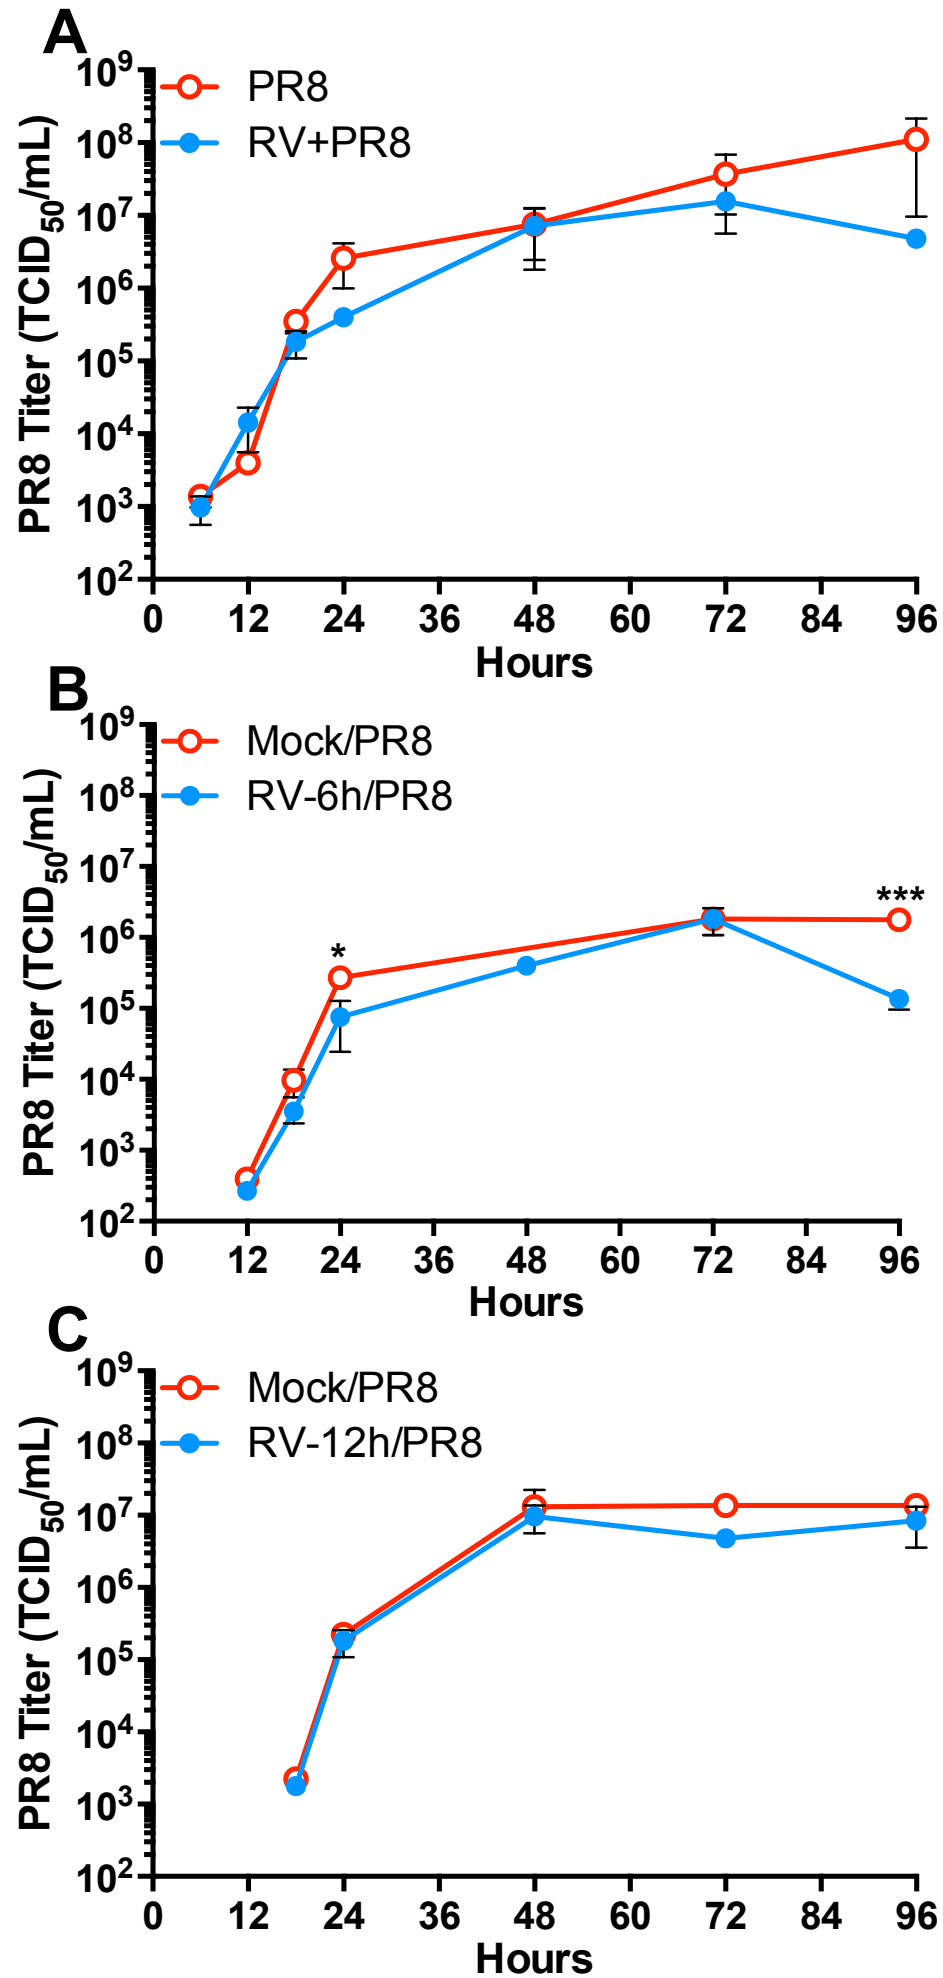

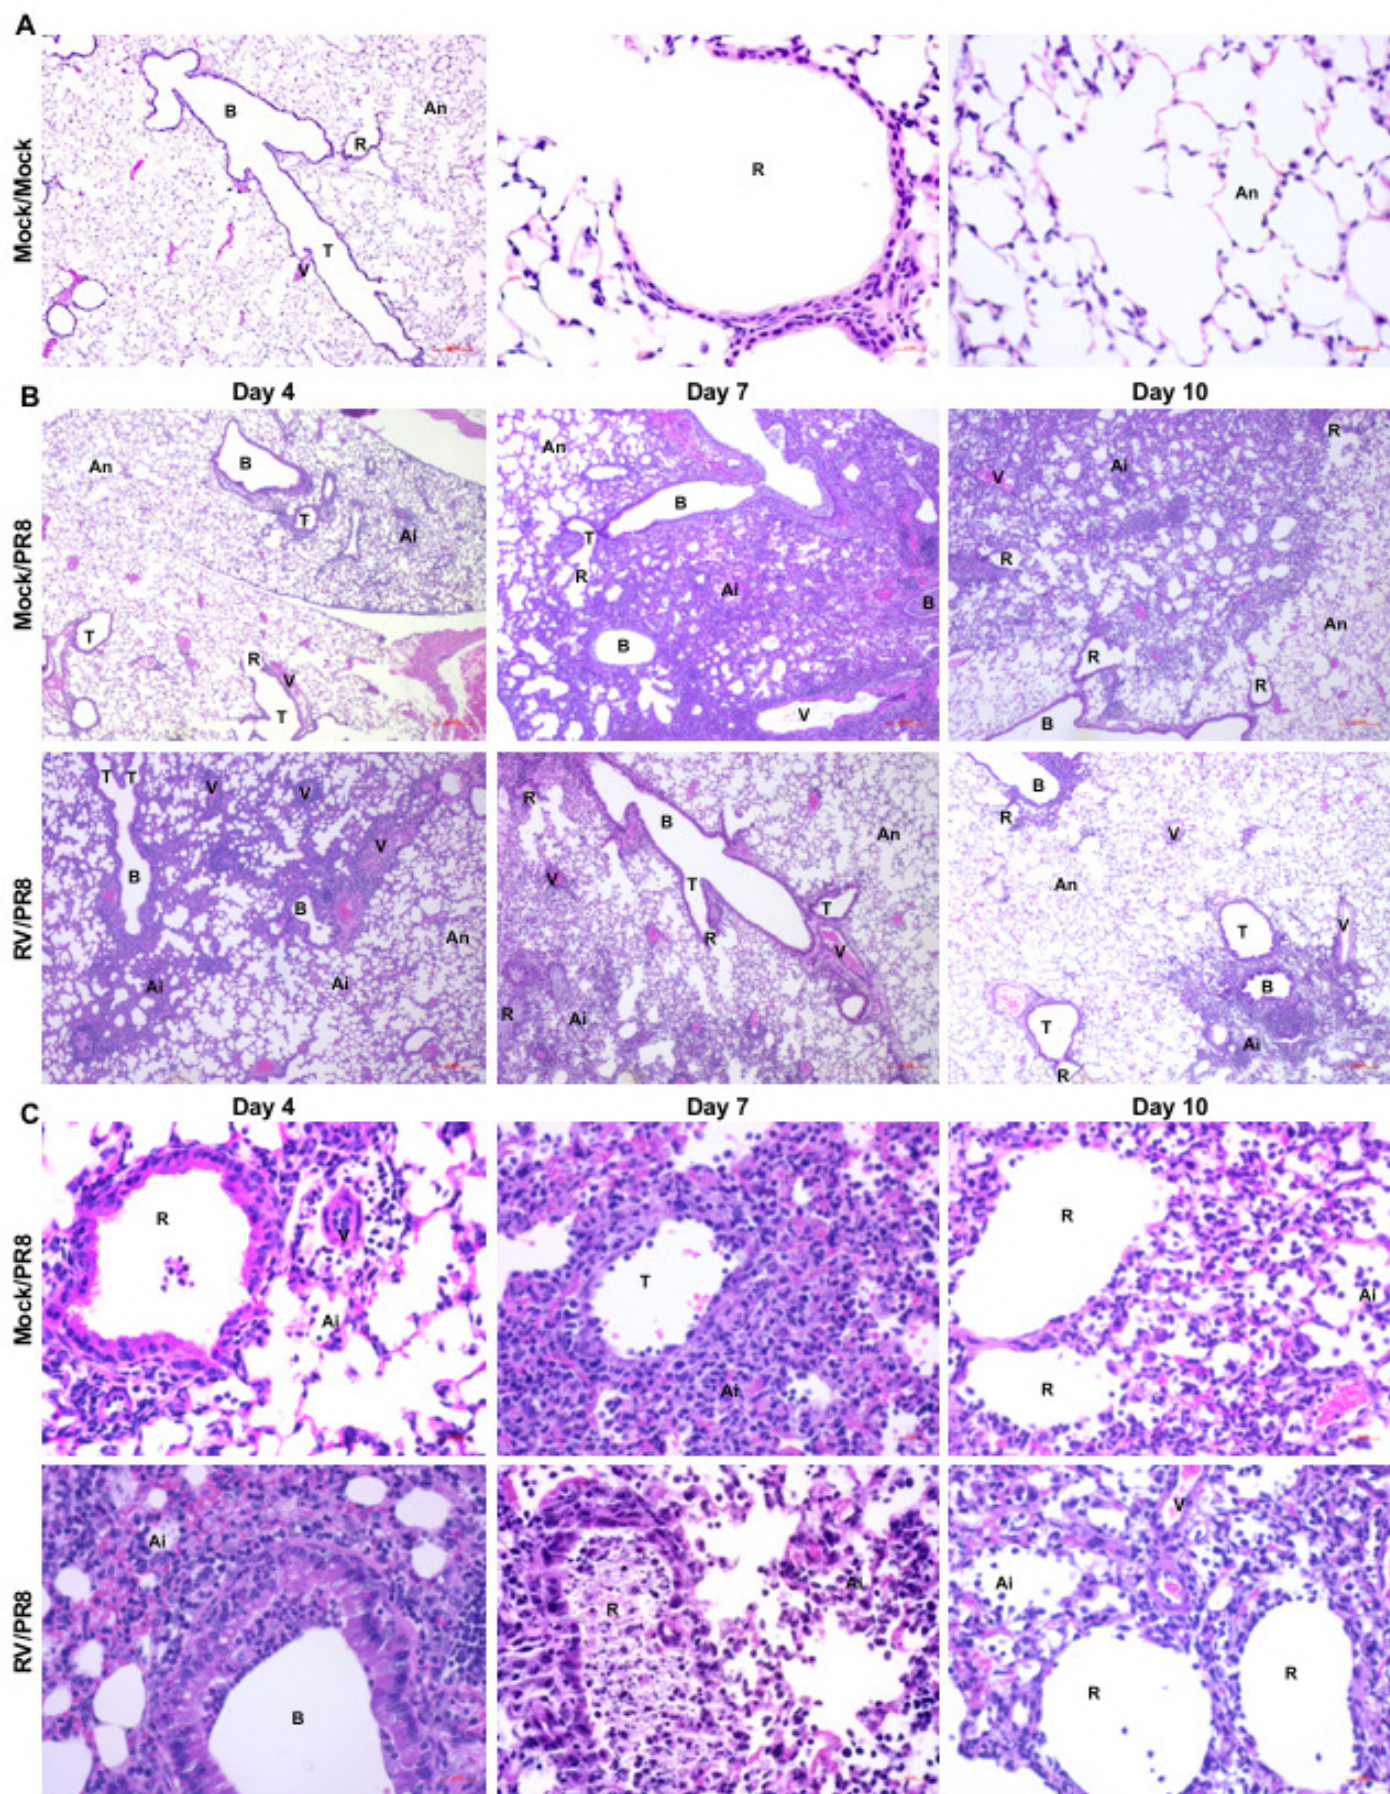

Figure 6

○ Mock/PR8<sub>Low</sub>  
 ● RV/PR8<sub>Low</sub>  
 ▲ RV+PR8<sub>Low</sub>  
 ▼ PR8<sub>Low</sub>/RV

○ Mock/PR8<sub>Med</sub>  
 ● RV/PR8<sub>Med</sub>  
 ▲ RV+PR8<sub>Med</sub>  
 ▼ PR8<sub>Med</sub>/RV

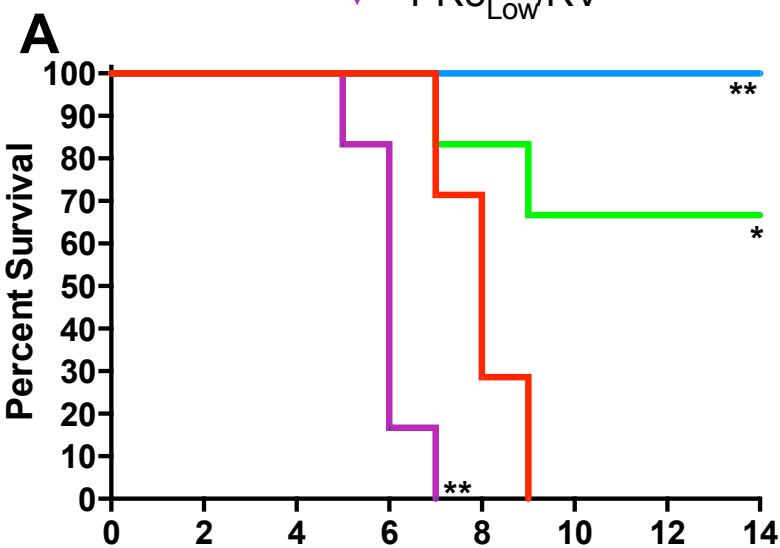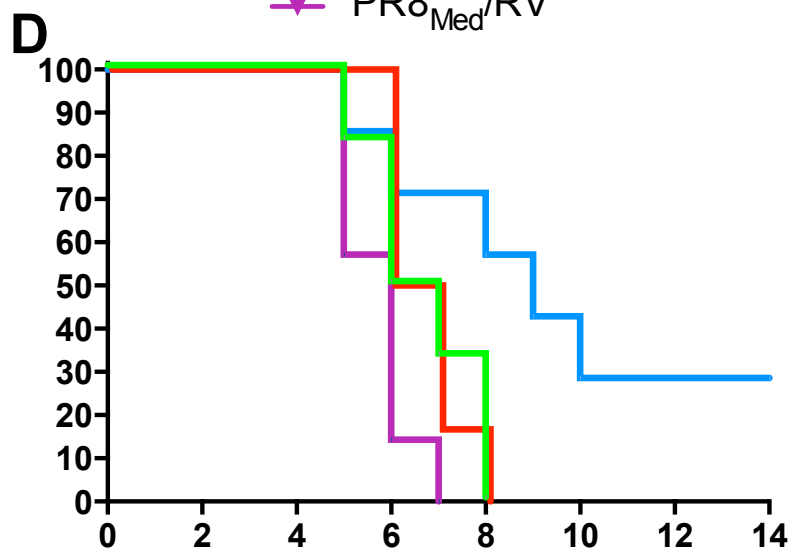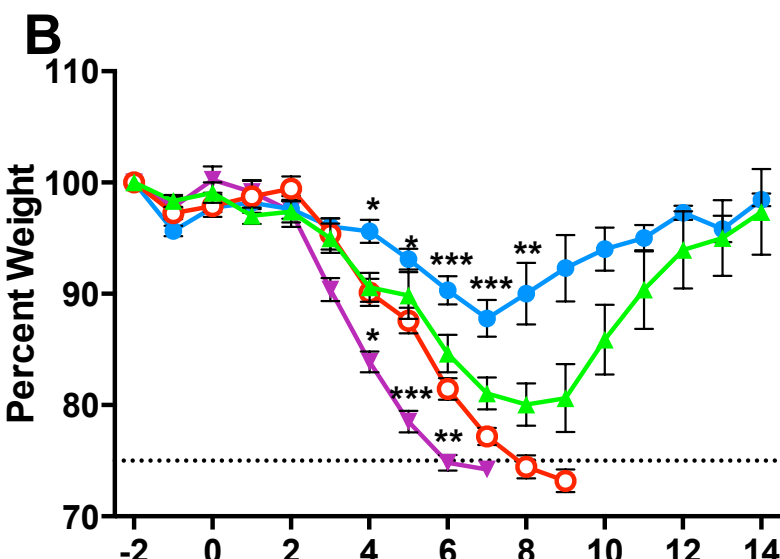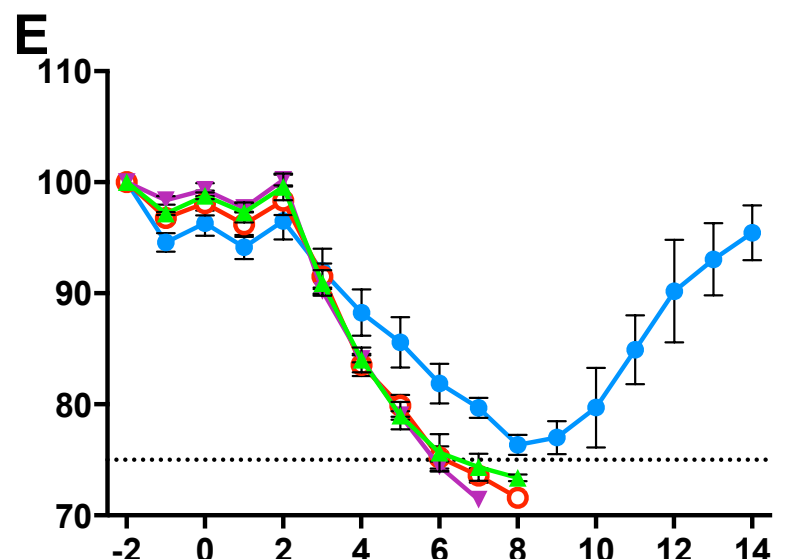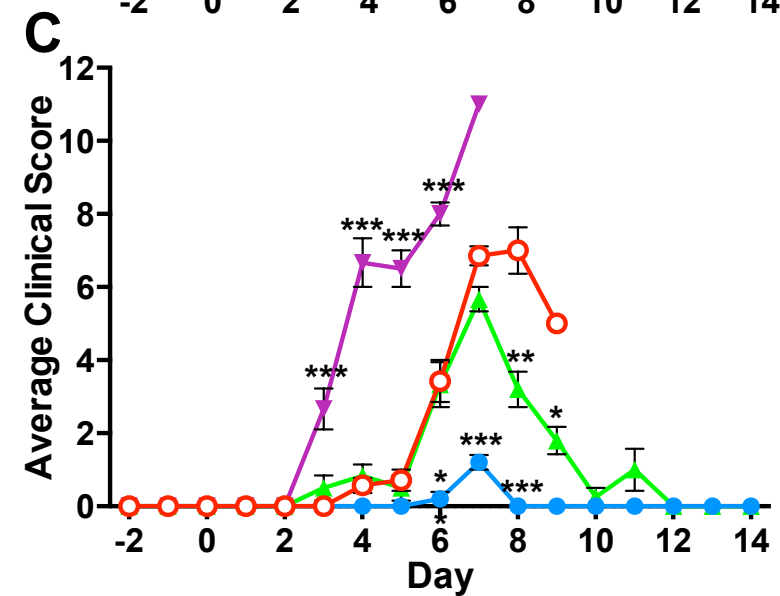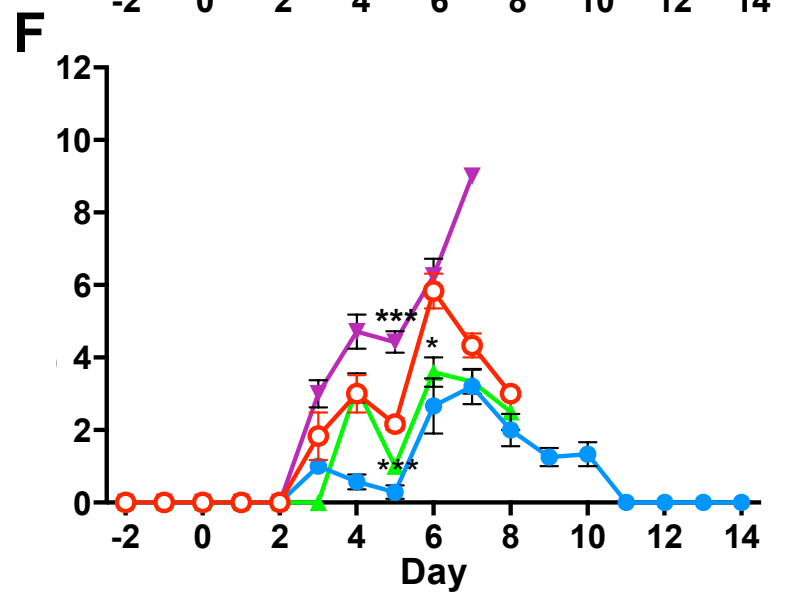

Figure 7

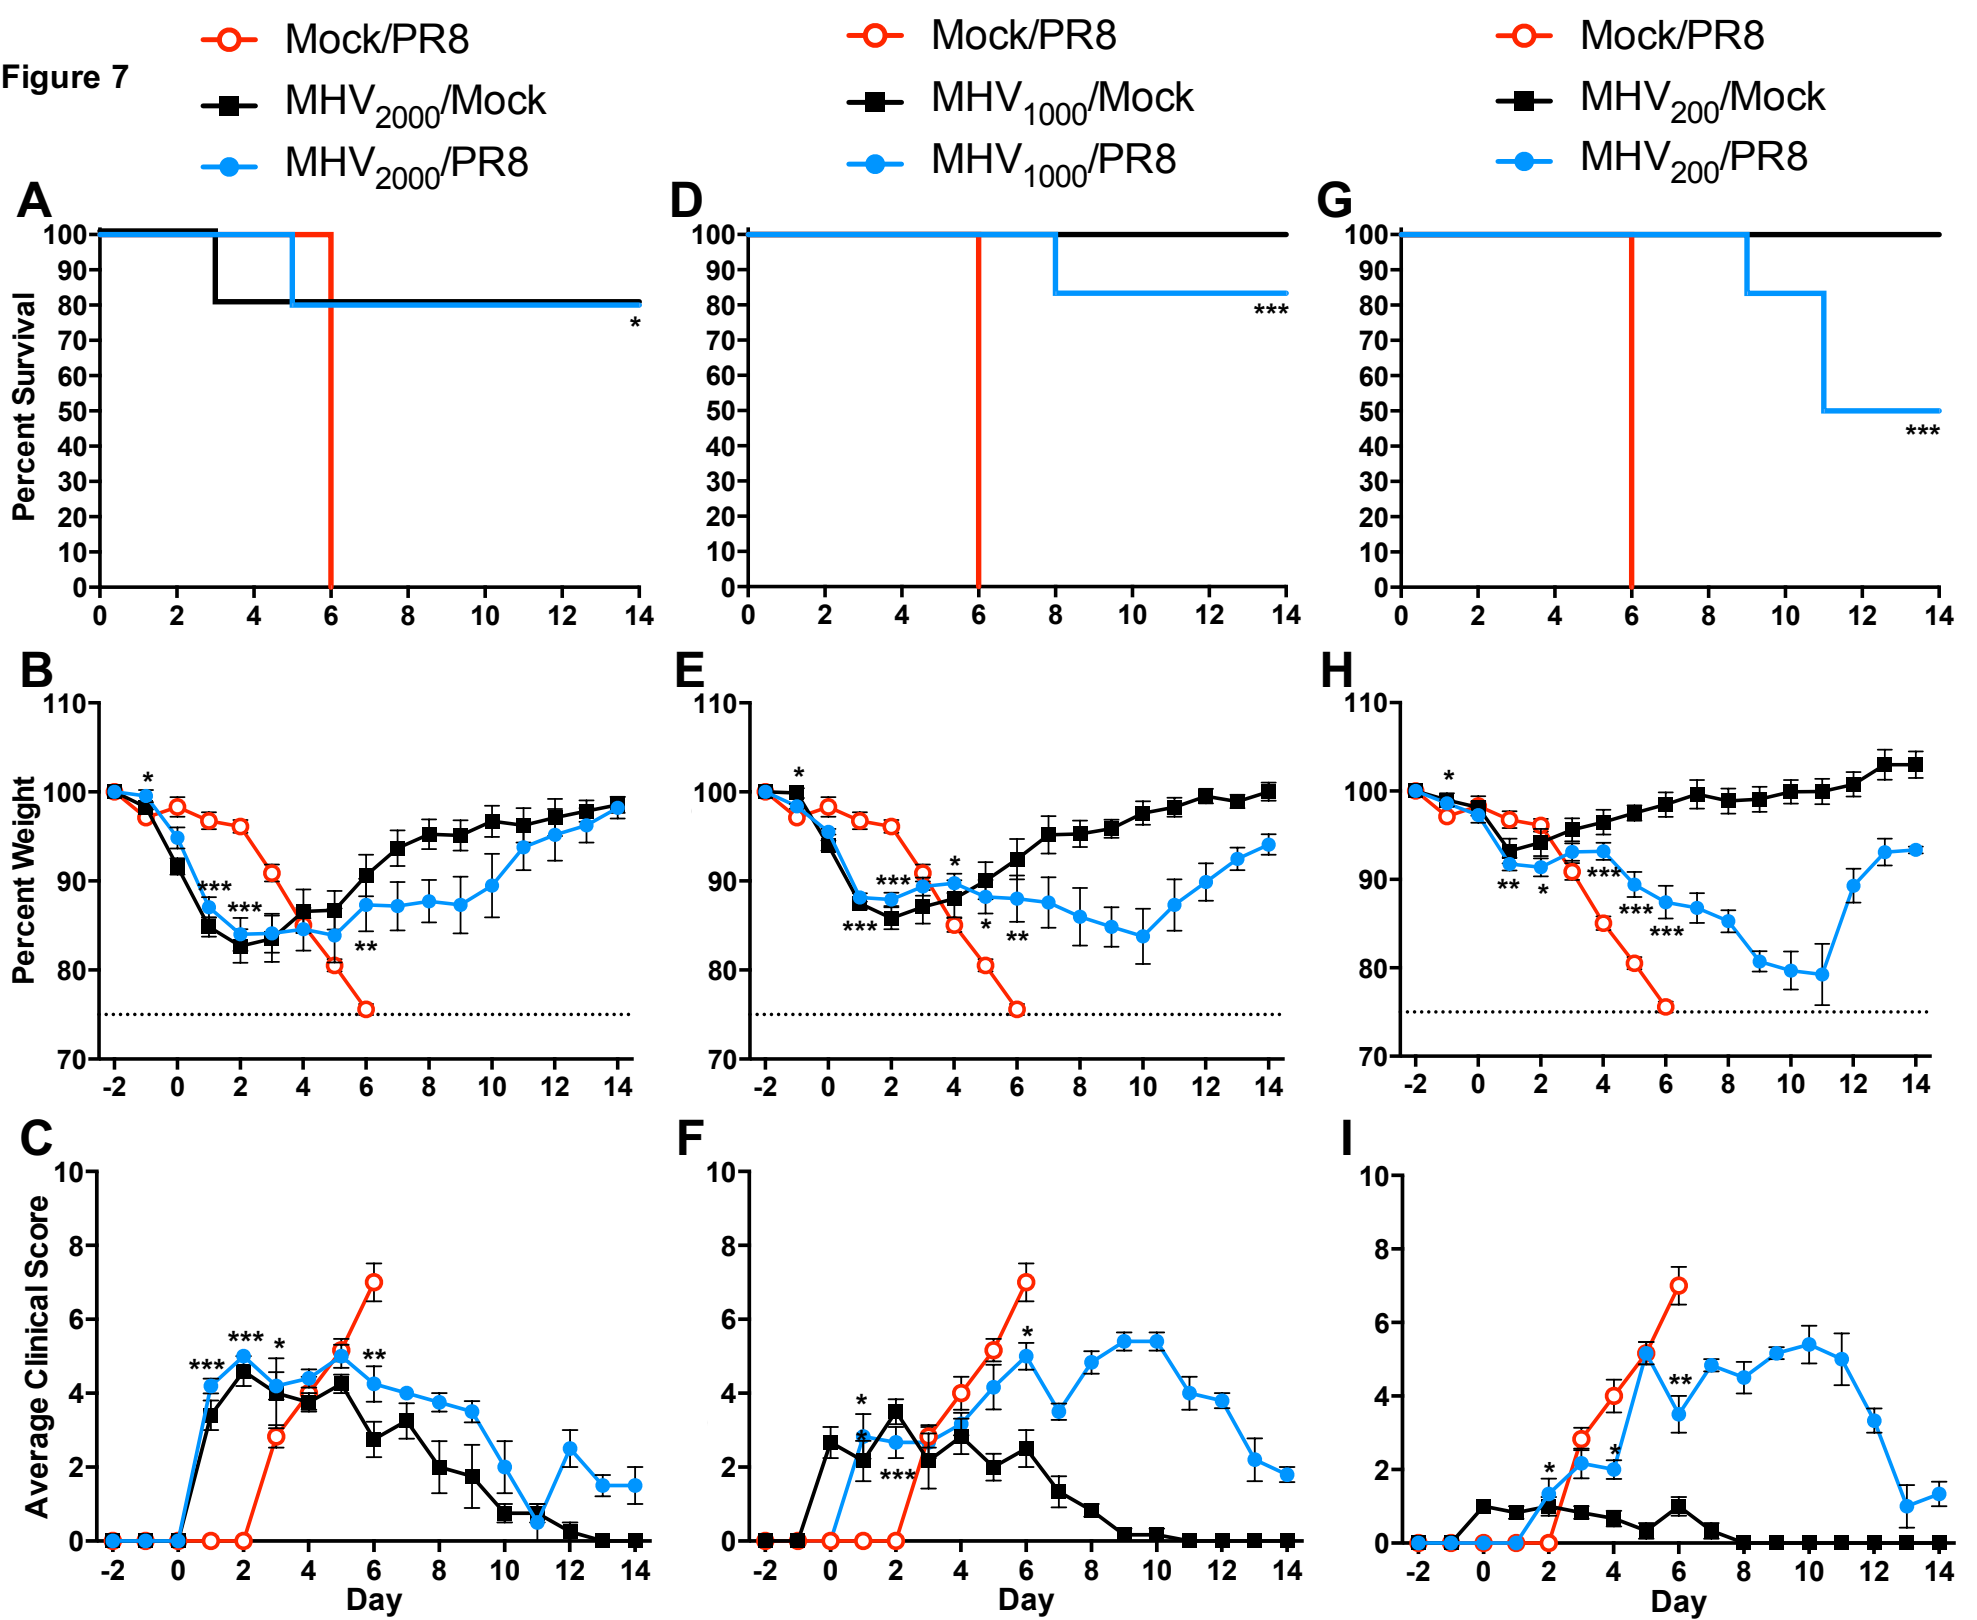

Source: http://biorxiv.org/content/10.1101/326546v1.full.pdf
